# Supplementary material for: Better evidence: prospective cohort study assessing the utility of an evidence-based clinical resource at the University of Rwanda
Source: PubMed Central journal article supplement — BMJ Open. 2019 Aug 8;9(8):e026947. doi: 10.1136/bmjopen-2018-026947 (PMC6701685; doi:10.1136/bmjopen-2018-026947), 2019-08-08
Supplement: bmjopen-2018-026947.draft_revisions.pdf [file bmjopen-2018-026947.draft_revisions.pdf]

# BMJ Open

BMJ Open is committed to open peer review. As part of this commitment we make the peer review history of every article we publish publicly available.

When an article is published we post the peer reviewers' comments and the authors' responses online. We also post the versions of the paper that were used during peer review. These are the versions that the peer review comments apply to.

The versions of the paper that follow are the versions that were submitted during the peer review process. They are not the versions of record or the final published versions. They should not be cited or distributed as the published version of this manuscript.

BMJ Open is an open access journal and the full, final, typeset and author-corrected version of record of the manuscript is available on our site with no access controls, subscription charges or pay-per-view fees (<http://bmjopen.bmj.com>).

If you have any questions on BMJ Open's open peer review process please email [info.bmjopen@bmj.com](mailto:info.bmjopen@bmj.com)

# BMJ Open

## Better evidence: Assessing the utility of an Evidence-Based Clinical Resource at the University of Rwanda

|                               |                                                                                                                                                                                                                                                                                                                                                                                                                                                                                                                                                                                                                                                                                                                                                                                                                                                                                                                                                                                                                                                              |
|-------------------------------|--------------------------------------------------------------------------------------------------------------------------------------------------------------------------------------------------------------------------------------------------------------------------------------------------------------------------------------------------------------------------------------------------------------------------------------------------------------------------------------------------------------------------------------------------------------------------------------------------------------------------------------------------------------------------------------------------------------------------------------------------------------------------------------------------------------------------------------------------------------------------------------------------------------------------------------------------------------------------------------------------------------------------------------------------------------|
| Journal:                      | <i>BMJ Open</i>                                                                                                                                                                                                                                                                                                                                                                                                                                                                                                                                                                                                                                                                                                                                                                                                                                                                                                                                                                                                                                              |
| Manuscript ID                 | bmjopen-2018-026947                                                                                                                                                                                                                                                                                                                                                                                                                                                                                                                                                                                                                                                                                                                                                                                                                                                                                                                                                                                                                                          |
| Article Type:                 | Research                                                                                                                                                                                                                                                                                                                                                                                                                                                                                                                                                                                                                                                                                                                                                                                                                                                                                                                                                                                                                                                     |
| Date Submitted by the Author: | 17-Oct-2018                                                                                                                                                                                                                                                                                                                                                                                                                                                                                                                                                                                                                                                                                                                                                                                                                                                                                                                                                                                                                                                  |
| Complete List of Authors:     | <p>Valtis, Yannis; Brigham and Women's Hospital Department of Medicine; Global Health Delivery Project at Harvard University<br/> Rosenberg, Julie; Global Health Delivery Project at Harvard University<br/> Wachter, Keri; Global Health Delivery Project at Harvard University; Harvard Medical School<br/> Kisenge, Rodrick; Muhimbili University of Health and Allied Sciences<br/> Mashili, Fredirick; Muhimbili University of Health and Allied Sciences<br/> Chande Mallya, Rehema; Muhimbili University of Health and Allied Sciences<br/> Walker, Timothy; University of Rwanda College of Medicine and Health Sciences<br/> Kabakambira, J. Damascene; NIDDK, Section on Ethnicity &amp; Health; University of Rwanda College of Medicine and Health Sciences<br/> Egide, Abahuje; University of Rwanda College of Medicine and Health Sciences<br/> Ntacyabukura, Blaise; University of Rwanda College of Medicine and Health Sciences<br/> Weintraub, Rebecca; Harvard Medical School; Global Health Delivery Project at Harvard University</p> |
| Keywords:                     | MEDICAL EDUCATION & TRAINING, Information technology < BIOTECHNOLOGY & BIOINFORMATICS, GENERAL MEDICINE (see Internal Medicine)                                                                                                                                                                                                                                                                                                                                                                                                                                                                                                                                                                                                                                                                                                                                                                                                                                                                                                                              |
|                               |                                                                                                                                                                                                                                                                                                                                                                                                                                                                                                                                                                                                                                                                                                                                                                                                                                                                                                                                                                                                                                                              |

SCHOLARONE™  
Manuscripts

## Better evidence: Assessing the utility of an Evidence-Based Clinical Resource at the University of Rwanda

Article

### Authors:

Yannis K. Valtis, MD <sup>1,2,3</sup>; Julie Rosenberg, MPH <sup>1,3</sup>; Keri Wachter, MPH <sup>1,4</sup>; Rodrick Kisenge, MD <sup>5</sup>; Fredirick Mashili, MD <sup>5</sup>; Rehema Chande-Mallya, PhD <sup>5</sup>; Tim Walker, MD <sup>6,7</sup>; Jean Damascene Kabakambira, MD <sup>7,8</sup>; Abahuje Egide, MD <sup>7</sup>; Blaise Ntacyabukura <sup>7</sup>, Rebecca L. Weintraub, MD <sup>1,2,3</sup>.

1. Global Health Delivery Project at Harvard University, Boston, MA.
2. Harvard Medical School, Boston, MA.
3. Brigham and Women's Hospital, Boston, MA.
4. Harvard T.H. Chan School of Public Health, Boston, MA.
5. Muhimbili University of Health and Allied Sciences, Dar es Salaam, Tanzania.
6. Calvary Mater Hospital, Newcastle, Australia.
7. University of Rwanda, Kigali, Rwanda.
8. National Institutes of Health, Bethesda, MD.

### Contact Information:

Correspondence should be addressed to Rebecca Weintraub, Brigham and Women's Hospital, Global Health Delivery Project, 75 Francis St, Boston, MA 02115; e-mail: [rebecca@globalhealthdelivery.org](mailto:rebecca@globalhealthdelivery.org).

## Abstract

**Objective:** Evidence-based clinical resources (EBCRs) have the potential to improve diagnostic and therapeutic accuracy. The majority of U.S. teaching medical institutions have incorporated them into clinical training. Many EBCRs are subscription-based, and their cost is prohibitive for most clinicians and trainees in low- and middle-income countries. We sought to determine the utility of EBCRs in an East African medical school.

**Setting:** The University of Rwanda (UR), a medical school located in East Africa.

**Participants:** Medical students and faculty members at UR.

**Interventions:** We offered medical students and faculty at UR free access to UpToDate, a leading EBCR and conducted a cohort study to assess its utility. Students completed two surveys on their study habits and gave us permission to access their activity on UpToDate and their grades.

**Results:** Of the 980 medical students invited to enroll over two years, 547 did (56%). Of eligible final-year students, 88% enrolled. At baseline, 92% of students reported ownership of an internet-capable device, and the majority indicated using free online resources frequently for medical education. Enrolled final-year students viewed, on average, 1.24 topics per day and continued to use UpToDate frequently after graduation from medical school. Graduating class exam performance was better after introduction of UpToDate than in previous years.

**Conclusions:** Removal of the cost barrier was sufficient to generate high uptake of a leading EBCR by senior medical students and habituate them to continued usage after graduation.

### Strengths and limitations of this study

- This is the first reported prospective cohort study of health professionals and trainees in Africa. Unlike previously conducted cross sectional studies, it will allow longitudinal tracking to investigate the learning behaviors of students and young physicians as they begin their career.
- This is the first study to link usage of online educational resources to performance in medical school examinations in Africa.
- Our ability to precisely track online usage of UpToDate eliminates recall bias that is likely to significantly impact findings of studies of educational interventions that are based on self-reporting.
- Given the observational nature of our study, we cannot make causal claims on the relationship between student use of UpToDate and their performance on medical school examinations.
- The relatively short follow-up period discussed in this paper limits our ability to understand the long term impact of offering UpToDate access to African health trainees.

## Introduction

The velocity of growth of the clinical evidence base is staggering: In the last three years alone, over 16,000 unique clinical studies posted new results on ClinicalTrials.gov.<sup>1</sup> There is more information emerging every year than any one person could ever retain. In response, educators in the United States (U.S.) have called for a shift in the basic paradigm of medical education, de-emphasizing the passive presentation of material and promoting problem-solving skills and the ability to find information and adapt it to the clinical situation at hand.<sup>2</sup> The Liaison Committee on Medical Education (LCME) mandates that self-directed learning be part of every accredited school's curriculum, and the American Board of Internal Medicine recently announced that maintenance of certification exams for internists and nephrologists will be open-book.<sup>3,4</sup> The historical focus on memorization is giving way to an emphasis on knowing how to find information, synthesize it, and apply it clinically. Clinicians who have not developed these skills during medical school or clinical training are at a disadvantage, which, ultimately, means their patients are at a disadvantage.

The ability to access and synthesize clinical information effectively and efficiently is particularly crucial for clinicians in low- and middle-income countries (LMICs). The health workforce shortage and absence of specialists forces clinicians to care for more patients with a broader range of complaints than their counterparts in high-income countries. Rwanda, a country of 11 million people, had, until recently, a total of 15 anesthesiologists, 25 obstetricians, and zero neurologists.<sup>5,6</sup> In addition, a study of 21 hospitals in LMICs documented substantial knowledge gaps among physicians.<sup>7</sup> Constraints in medical education in these countries are likely responsible for both workforce and knowledge gaps. In 2011, the Sub-Saharan African Medical

1  
2  
3 School Study group surveyed 146 of 168 medical schools in the region and found widespread  
4 shortages in qualified faculty and infrastructure.<sup>8</sup>  
5  
6

7  
8 To address the challenge of the rapidly expanding evidence base in medicine, several  
9  
10 organizations in high-income countries have created evidence-based clinical resources (EBCRs)  
11  
12 – regularly updated, expert-authored, online tools that synthesize the primary literature to guide  
13  
14 clinical decision making. Over the years, UpToDate, which was founded at Harvard Medical  
15  
16 School in 1992, has emerged as a leading EBCR in high-income countries, and several studies  
17  
18 have documented its utility: Use of UpToDate has been associated with improved examination  
19  
20 performance among internal medicine residents, as well as lower mortality at U.S. hospitals.<sup>9,10</sup>  
21  
22

23  
24 As of February 2018, 90% of teaching U.S. medical institutions and 100% of the top 20 U.S.  
25  
26 medical schools (as ranked by U.S. News & World Report) subscribed to UpToDate.<sup>11,12,13</sup>  
27

28  
29 Despite the high demand for UpToDate in U.S. medical education, none of the 168 medical  
30  
31 schools in sub-Saharan Africa subscribe to its services, partly because of the high subscription  
32  
33 cost. An individual physician subscription to UpToDate in Rwanda costs \$299 per year; Rwanda  
34  
35 spent \$52 per capita on healthcare in 2014.<sup>14</sup>  
36

37  
38 Given their utility in high-income countries, access to EBCRs could help address some of the  
39  
40 challenges faced by clinicians in LMICs. We hypothesize that access to better evidence could  
41  
42 improve the knowledge base of these clinicians, increase their perception of self-efficacy, and  
43  
44 create a professional habit of seeking evidence at the point of care. This could be particularly  
45  
46 beneficial for clinicians caring for a large number of complex patients without access to  
47  
48 specialists. We have previously reported on a program which provides donated UpToDate  
49  
50 subscriptions to clinicians in LMICs, in which we found that most use UpToDate with high  
51  
52  
53  
54  
55  
56  
57  
58  
59  
60

1  
2  
3 frequency and many report changing their clinical decision making as a result of having access to  
4 UpToDate.<sup>15</sup>  
5

6  
7 We postulated that medical school is the optimal moment to introduce EBCRs to LMIC  
8 physicians-in-training, as it is *de facto* the first locus of professional habit formation, and often  
9 their last formal one, as many clinicians in LMICs do not receive post-graduate education.  
10

11  
12 Additionally, providing access to EBCRs to medical students in LMICs is a matter of equity:  
13 students who have worked hard to care for their community in LMICs should have the same  
14 opportunity to learn and provide quality care as their counterparts in U.S. medical schools.  
15  
16  
17  
18  
19  
20  
21  
22  
23

## 24 **Methods**

### 25 Setting

26  
27 The University of Rwanda (UR) is the only medical degree-granting school in Rwanda at this  
28 time and is a public university. 76% of students at UR are recipients of bursaries from the  
29 Government of Rwanda.<sup>16</sup> Medical students enter UR after successful completion of high school  
30 and, during the study period, completed a 6-year medical education curriculum consisting of two  
31 years of pre-clinical education followed by 4 years of clinical education in the wards.  
32  
33  
34  
35  
36  
37  
38  
39

### 40 Intervention

41  
42 In the fall of 2014, the authors formed an agreement with Wolters Kluwer, the parent company  
43 of UpToDate, to facilitate the donations of UpToDate subscriptions to medical students in sub-  
44 Saharan Africa. With appropriate IRB approval, medical students and faculty at the University of  
45 Rwanda were invited by email to enroll in our study. “Faculty member” was defined as anyone  
46 who teaches undergraduate medical students, which meant that residents were considered  
47 faculty. Undergraduate medical students, who unlike U.S. medical students are admitted to  
48  
49  
50  
51  
52  
53  
54  
55  
56  
57  
58  
59  
60



1  
2  
3 medical school after high school at age 18, were invited to enroll as well. Students were invited  
4  
5 in cohorts that spanned the different years of medical school (see Supplementary Appendix 2).  
6  
7 Enrollment was voluntary and not mandated by faculty or the curriculum. Each participant  
8  
9 received a free 5-year individual subscription to UpToDate, which allowed them to access the  
10  
11 website from any computer or mobile device. The authors undertook no recruitment or training  
12  
13 efforts. Data reported in this paper was generated in 2015–2017.  
14  
15

### 16 17 Evaluation

18  
19 Students were asked to complete an online baseline survey to document their study habits before  
20  
21 provision of UpToDate and an Annual Evaluation survey. We chose questions around students'  
22  
23 baseline utilization of the Internet in medical education, as others have identified access to  
24  
25 devices and the Internet as potential barriers to EBCR utilization.<sup>17</sup> Students' responses over time  
26  
27 were linked using their name and email. All participant activity on the UpToDate website and  
28  
29 mobile application was tracked remotely and linked to survey responses. An anonymized dataset  
30  
31 of all student grades for the graduating classes of 2012–2017 was obtained to assess the impact of  
32  
33 UpToDate on class examination performance. Lastly, to understand student usage of UpToDate  
34  
35 over time, we plotted the average number of topics viewed per month by active users. To  
36  
37 characterize a stable cohort of users over time, we plotted the average number of topics viewed  
38  
39 by students in their final year who enrolled before March 1<sup>st</sup> 2016. Supplementary Appendix 1  
40  
41 describes the statistical approach of the data analysis, which was performed on Stata SE 14 and  
42  
43 Microsoft Excel.  
44  
45  
46  
47

### 48 49 Patient and public involvement

50  
51 Patients were not the subject of this study. A medical student at UR (BN) is a co-author of this  
52  
53 study and brought the student perspective into the interpretation of the data.  
54  
55  
56  
57  
58  
59

## Results

Of the 980 students and 1,084 faculty invited to enroll into the study during the 2015-2017 study period, 547 (56%) students and 325 (29%) faculty did. The highest enrollment rate (87%) was observed among students in their final (sixth) year of medical school, who are called “Doctorate 4” or Doc4 students at UR (Supplementary Appendix 2). In our baseline survey, 92% of student respondents overall and 96% of Doc4 students reported ownership of at least one internet-capable device (Figure 1a). Free electronic resources—primarily Medscape, Google, and Wikipedia—were used frequently for the purposes of medical education (Figure 1b). A small percentage reported frequent usage of UpToDate at baseline.

All users who completed the enrollment survey had an individual UpToDate account created for them and received an email with instructions on how to set up their UpToDate password. Of those who activated their UpToDate account, 76% of faculty and 64% of students viewed, on average, at least one UpToDate topic per week; 13% of faculty and 23% of students viewed, on average, one topic or more per day. In a multivariate linear regression looking at variables associated with UpToDate usage frequency, student year at enrollment was the only significantly associated variable (Table 1). Figure 2 shows average UpToDate usage by year of student at enrollment.

One year after enrollment, 52% of students completed the annual evaluation; 74% of Doc4 students did so. Both graduates, who had enrolled into the study as Doc4 students, and continuing students reported increased usage of UpToDate. Continuing students also reported decreased use of Google and Wikipedia (Figure 3).

1  
2  
3 To assess the effect of providing UpToDate to students on their educational performance, we  
4 plotted the average grades of each graduating class from 2012 to 2017 (599 students in total) and  
5 compared the pre-UpToDate period (2012-2015; average grade 68) to the post-UpToDate period  
6 (2016-2017; average grade 75) (Figure 4). Both a simple t-test as well as a two-way ANOVA  
7 showed a statistically significant difference (Table 2). In 2017, a student who scored 68 would  
8 have ranked at the 16<sup>th</sup> percentile of the class, while a student scoring 75 would have ranked at  
9 the 66<sup>th</sup> percentile.  
10  
11

12 We used remote tracking to assess Doc4 student usage over time and found that it spiked in May  
13 2016, as students prepared for their graduation exams in June. Usage fell significantly during  
14 summer vacation, but rose again in September and October, as the new graduates began their  
15 careers as physicians, either in residency or in independent practice. A similar pattern of usage  
16 over time was seen among faculty (Figure 5).  
17  
18  
19  
20  
21  
22  
23  
24  
25  
26  
27  
28  
29  
30  
31  
32

### 33 **Discussion**

34 Our findings represent the first prospective cohort study of medical students in Africa and  
35 suggest that access to devices and the internet might not be a significant barrier for African  
36 medical students wishing to access online resources. Our findings align with observations from a  
37 2016 in Zimbabwe and contrast two earlier studies in Nigeria published in 2004 and 2008 that  
38 suggest lack of access to internet.<sup>18,19,20</sup> The differences might be related to the passage of time  
39 or resource availability differences between Rwanda and Nigeria. The findings suggest that, in  
40 Rwanda, our focus should not be on securing devices but on securing access to the latest online  
41 tools and evidence.  
42  
43  
44  
45  
46  
47  
48  
49  
50  
51  
52  
53  
54  
55  
56  
57  
58  
59  
60

1  
2  
3 Our study also shows that students, especially final-year students, used a leading EBCR  
4 frequently when the cost barrier was removed. This was achieved with no provision of internet-  
5 capable devices, no subsidizing of mobile internet data, no dedicated training activities on EBCR  
6 use, and no curricular integration of EBCRs. Overall, our findings suggest that removing the cost  
7 barrier to access of EBCRs can generate uptake among a subset of medical students in Africa.  
8  
9

10  
11  
12 The low uptake of UpToDate by junior UR students could be related to the basic science focus of  
13 their curriculum, which makes UpToDate's clinical content less relevant.  
14

15  
16 The introduction of an EBCR during the last year of medical school may lead to habit formation.  
17  
18 Among students receiving an EBCR subscription in their final year, usage was sustained for the  
19 one and a half year period monitored after graduation. Additionally, self-reported usage of non-  
20 validated sources such as Google and Wikipedia fell among students within a year of UpToDate  
21 provision. In 2013, Gawande argued that habit change and formation in healthcare is a complex  
22 process that can often take decades.<sup>21</sup> He also argued that some habits form quickly and that  
23 those might be the ones that make a physician's workflow faster and more efficient. Our study  
24 suggests that UpToDate may fall into this category of tools and habits that facilitate faster, more  
25 efficient work.  
26  
27  
28  
29  
30  
31  
32  
33  
34  
35  
36  
37  
38  
39

40 The temporal association of free access to UpToDate with an improvement of the overall  
41 examination performance of the graduating class may be causal or due to another explanation, as  
42 discussed below. It is consistent, however, with previous reports of associations between  
43 UpToDate usage and performance in exams by residents in the U.S. and Japan, and practicing  
44 physicians in the U.S.  
45  
46  
47  
48  
49  
50

## 51 Limitations

52  
53  
54  
55  
56  
57  
58  
59  
60

1  
2  
3 Our study is subject to selection bias given its observational nature. It is possible that students  
4 with regular access to email were more likely to respond to our email-based invitation, thus  
5 biasing the response set, especially with respect to use of electronic resources and internet  
6 access. The high enrollment rate among Doc4 students mitigates this effect to some extent.  
7  
8 The use of a historical control to assess the impact of UpToDate's introduction on student grades  
9 also has several limitations. First, no causal arguments can be made, given the fact that different  
10 exams were used each year and different students took them. While UpToDate may have helped  
11 students prepare for their exams more efficiently and increase their knowledge base, it is also  
12 possible that the exams in 2016 and 2017 were easier than those of years past or that the students  
13 were independently academically superior to the previous classes. Second, it is possible that test  
14 answers may not be contained/addressed in UpToDate, although the UR faculty among the  
15 authors of this paper do not believe that to be the case.  
16  
17  
18  
19  
20  
21  
22  
23  
24  
25  
26  
27  
28  
29

### 30 Next steps

31  
32 Due to its longitudinal nature, this study has the potential to offer additional insights on the  
33 changes in learning behaviors of African health trainees over time. Qualitative research on this  
34 student cohort could help elucidate the drivers of different study behaviors, and the perceived  
35 impact of resources such as UpToDate on clinician's knowledge base and self-efficacy.  
36  
37 Future research might explore other EBCRs and features that impact uptake and utility. We  
38 focused on UpToDate because of the body of literature that supports its value in high-income  
39 countries. However, we hypothesize that a suite of EBCRs and learning tools, possibly in  
40 multiple languages, might be helpful for trainees in LMICs. Given the relatively easy scalability  
41 of software-based tools, we believe that we can continue to decrease the barriers for trainees in  
42 LMICs to access the best available evidence at the frontline of care delivery. Our vision is that  
43  
44  
45  
46  
47  
48  
49  
50  
51  
52  
53  
54  
55  
56  
57  
58  
59  
60

1  
2  
3 this work can prepare and inform how the next generation of clinicians in LMICs practices  
4  
5 evidence-based medicine. Although our research focused on LMICs, disparities in access to  
6  
7 high-quality EBCRs might exist within U.S. medical education as well, which can also be an  
8  
9 area of future research and programming. As medicine continues to evolve rapidly and medical  
10  
11 education shifts its focus from memorization to critical processing of information, we must  
12  
13 ensure that all learners have equitable access to the best information available.  
14  
15  
16  
17  
18

19 **Acknowledgements:** The authors wish to thank Dr. Peter Bonis, Dr. Denise Basow, Denise  
20  
21 Gilpin, Dr. Ellie Baron, Becky Mueller, and Bin Cao at Wolters Kluwer for their generous  
22  
23 support of this work. They would also like to thank Marie Teichman, Teresa Oszkinis, Elissa  
24  
25 Dakers and Fatima Fairfax for logistical support of this study. Lastly, the authors wish to thank  
26  
27 Kate Miller and Dr. Shelley Hurwitz for statistical expertise and guidance.<sup>a</sup>  
28  
29  
30  
31  
32

33 **Funding:** Wolters Kluwer donated the free UpToDate subscriptions. Y.K. Valtis received  
34  
35 funding from the Alexander Onassis Foundation, the Harvard Medical School Abundance Fund,  
36  
37 and the Scholars In Medicine Office at Harvard Medical School. Global Health Delivery staff  
38  
39 were supported by the Abundance Fund. Wolters Kluwer did not provide any monetary support  
40  
41 to this study.  
42  
43  
44  
45  
46

---

47  
48 <sup>a</sup> This work was conducted with support from Harvard Catalyst, The Harvard Clinical and  
49  
50 Translational Science Center (National Center for Research Resources and the National Center  
51  
52 for Advancing Translational Sciences, National Institutes of Health Award UL1 TR001102), and  
53  
54 financial contributions from Harvard University and its affiliated academic healthcare centers.  
55  
56 The content is solely the responsibility of the authors and does not necessarily represent the  
57  
58 official views of Harvard Catalyst, Harvard University and its affiliated academic healthcare  
59  
60 centers, or the National Institutes of Health.

1  
2  
3  
4  
5 **Ethical Approval:** The research described here was approved by the Harvard Medical School  
6 Institutional Review Board and the University of Rwanda Institutional Review Board.  
7  
8  
9

10  
11  
12 **Data sharing:** No additional data available.  
13  
14  
15

16  
17 **Contributorship:** YV, KR, KW, RK, FM, RCM, TW, RW designed the study and co-wrote its  
18 protocol. JDK, AE, BN implemented the study at the University of Rwanda. YV analyzed the  
19 data and drafted this manuscript. All authors edited the manuscript. RW oversaw the entire  
20 design, implementation, and analysis of the study.  
21  
22  
23  
24  
25  
26  
27  
28  
29  
30  
31  
32  
33  
34  
35  
36  
37  
38  
39  
40  
41  
42  
43  
44  
45  
46  
47  
48  
49  
50  
51  
52  
53  
54  
55  
56  
57  
58  
59  
60

---

## References

<sup>1</sup> ClinicalTrials.gov [Internet]. U.S. National Institutes of Health. Trends, Charts, and Maps; 2017 [cited 2018 Jan 12]. Available from:

<https://clinicaltrials.gov/ct2/resources/trends#RegisteredStudiesOverTime>

<sup>2</sup> Schwartzstein RM, Roberts DH. Saying Goodbye to Lectures in Medical School - Paradigm Shift or Passing Fad? *N Engl J Med*. 2017 Aug 17;377(7):605-607. doi:

10.1056/NEJMp1706474. PubMed PMID: 28813217.

<sup>3</sup> Weinberger SE. Opening the Book on Maintenance of Certification. *Ann Intern Med*. 2017 Sep 5;167(5):353-354. doi: 10.7326/M17-1853. Epub 2017 Aug 15. PubMed PMID: 28806790.

<sup>4</sup> LCME Website [Internet]. Liaison Committee on Medical Education. Functions and Structure of a Medical School; 2016 [cited 2018 Jan 12]. Available from: <http://lcme.org/publications/>

<sup>5</sup> Holmer H, Lantz A, Kunjumen T, Finlayson S, Hoyler M, Siyam A, Montenegro H, Kelley ET, Campbell J, Cherian MN, Hagander L. Global distribution of surgeons, anaesthesiologists, and obstetricians. *Lancet Glob Health*. 2015 Apr 27;3 Suppl 2:S9-11. doi: 10.1016/S2214-109X(14)70349-3. PubMed PMID: 25926323.

<sup>6</sup> Bower JH, Zenebe G. Neurologic services in the nations of Africa. *Neurology*. 2005 Feb 8;64(3):412-5. PubMed PMID: 15699367.



1  
2  
3  
4  
5  
6  
7 <sup>7</sup> Nolan T, Angos P, Cunha AJ, Muhe L, Qazi S, Simoes EA, Tamburlini G, Weber M, Pierce  
8 NF. Quality of hospital care for seriously ill children in less-developed countries. *Lancet*. 2001  
9 Jan 13;357(9250):106-10. PubMed PMID: 11197397.  
10  
11  
12

13  
14  
15  
16 <sup>8</sup> Mullan F, Frehywot S, Omaswa F, Buch E, Chen C, Greysen SR, Wassermann T, Abubakr DE,  
17 Awases M, Boelen C, Diomande MJ, Dovlo D, Ferro J, Haileamlak A, Iputo J, Jacobs M,  
18 Koumaré AK, Mipando M, Monekosso GL, Olapade-Olaopa EO, Rugarabamu P, Sewankambo  
19 NK, Ross H, Ayas H, Chale SB, Cyprien S, Cohen J, Haile-Mariam T, Hamburger E, Jolley L,  
20 Kolars JC, Kombe G, Neusy AJ. Medical schools in sub-Saharan Africa. *Lancet*. 2011 Mar  
21 26;377(9771):1113-21. doi: 10.1016/S0140-6736(10)61961-7. Epub 2010 Nov 10. Erratum in:  
22 *Lancet*. 2011 Mar 26;377(9771):1076. PubMed PMID: 21074256.  
23  
24  
25  
26  
27  
28  
29  
30

31  
32  
33  
34 <sup>9</sup> McDonald FS, Zeger SL, Kolars JC. Factors associated with medical knowledge acquisition  
35 during internal medicine residency. *J Gen Intern Med*. 2007 Jul;22(7):962-8. Epub 2007 Apr 28.  
36 PubMed PMID: 17468889; PubMed Central PMCID: PMC2219722.  
37  
38  
39  
40

41  
42  
43 <sup>10</sup> Isaac T, Zheng J, Jha A. Use of UpToDate and outcomes in US hospitals. *J Hosp Med*. 2012  
44 Feb;7(2):85-90. doi: 10.1002/jhm.944. Epub 2011 Nov 16. PubMed PMID: 22095750.  
45  
46  
47  
48  
49

50  
51 <sup>11</sup> UpToDate website [Internet]. Wolters Kluwer. Editorial; 2017 [cited 2018 Jan 12]. Available  
52 from: <https://www.uptodate.com/home/editorial>  
53  
54  
55  
56  
57  
58  
59

1  
2  
3  
4  
5  
6  
7 <sup>12</sup> US News & World Report Website [Internet]. US News & World. 2018 Best Medical Schools:  
8 Research; 2017 [cited 2018 Jan 12]. Available from: [https://www.usnews.com/best-graduate-](https://www.usnews.com/best-graduate-schools/top-medical-schools/research-rankings?int=af3309&int=b3b50a&int=b14409)  
9 schools/top-medical-schools/research-rankings?int=af3309&int=b3b50a&int=b14409  
10  
11  
12  
13

14  
15  
16 <sup>13</sup> Personal Communication. Top 20 US Research Medical Schools, as ranked by US News &  
17 World Report in 2017 were contacted by email and asked whether they offer UpToDate access to  
18 their medical students.  
19  
20  
21  
22

23  
24  
25 <sup>14</sup> World Bank Website [Internet]. The World Bank. Health Expenditure per capita; 2017 [cited  
26 2018 Jan 12]. Available from: <https://data.worldbank.org/indicator/SH.XPD.PCAP>  
27  
28  
29

30  
31  
32 <sup>15</sup> Valtis YK, Rosenberg J, Bhandari S, Wachter K, Teichman M, Beauvais S, Weintraub R.  
33 Evidence-based medicine for all: what we can learn from a programme providing free access to  
34 an online clinical resource to health workers in resource-limited settings. *BMJ Glob Health*. 2016  
35 May 23;1(1):e000041. doi: 10.1136/bmjgh-2016-000041. eCollection 2016. PubMed PMID:  
36 28588926; PubMed Central PMCID: PMC5321332.  
37  
38  
39  
40  
41  
42  
43  
44

45  
46 <sup>16</sup> UR Website [Internet]. University of Rwanda Planning M&E Unit. Facts and Figures; 2017  
47 [cited 2018 Jan 12]. Available from: [http://ur.ac.rw/sites/default/files/Facts%20and%20Figures-](http://ur.ac.rw/sites/default/files/Facts%20and%20Figures-2017-Final%20to%20be%20published.pdf#overlay-context=)  
48 2017-Final%20to%20be%20published.pdf#overlay-context=  
49  
50  
51  
52  
53  
54  
55  
56  
57  
58  
59  
60

1  
2  
3  
4  
5  
6  
7  
8  
9  
10  
11  
12  
13  
14  
15  
16  
17  
18  
19  
20  
21  
22  
23  
24  
25  
26  
27  
28  
29  
30  
31  
32  
33  
34  
35  
36  
37  
38  
39  
40  
41  
42  
43  
44  
45  
46  
47  
48  
49  
50  
51  
52  
53  
54  
55  
56  
57  
58  
59  
60

---

<sup>17</sup> Mazloomdoost D, Mehregan S, Mahmoudi H, Soltani A, Embi PJ. Perceived barriers to information access among medical residents in Iran: obstacles to answering clinical queries in settings with limited Internet accessibility. *AMIA Annu Symp Proc.* 2007 Oct 11:523-7. PubMed PMID: 18693891; PubMed Central PMCID: PMC2655820

<sup>18</sup> Bello IS, Arogundade FA, Sanusi AA, Ezeoma IT, Abioye-Kuteyi EA, Akinsola A. Knowledge and utilization of Information Technology among health care professionals and students in Ile-Ife, Nigeria: a case study of a university teaching hospital. *J Med Internet Res.* 2004 Dec 17;6(4):e45. PubMed PMID: 15631969; PubMed Central PMCID: PMC1550621.

<sup>19</sup> Odusanya OO, Bamgbala OA. Computing and information technology skills of final year medical and dental students at the College of Medicine University of Lagos. *Niger Postgrad Med J.* 2002 Dec;9(4):189-93. PubMed PMID: 12690677.

<sup>20</sup> Parve S, Ershadi A, Karimov A, Dougherty A, Ndhlovu CE, Chidzonga MM, Sadigh M. Access, attitudes and training in information technologies and evidence-based medicine among medical students at University of Zimbabwe College of Health Sciences. *Afr Health Sci.* 2016 Sep;16(3):860-865. PubMed PMID: 27917222; PubMed Central PMCID: PMC5111979.

<sup>21</sup> Gawande A. Slow Ideas. *The New Yorker.* 2013 Jul 29.

1  
2  
3 **Figure legends:**  
4  
5  
6  
7

8 **Figure 1: Baseline survey of Rwandan medical students.** (A) shows the percentage of students  
9 at UR reporting that they own a particular internet-capable device or use it in medical education.  
10 “Any device” refers to any of the following: tablet, smartphone, laptop, desktop. (B) shows the  
11 percentage of students indicating that they use a specific resource to study for coursework or  
12 prepare for examinations. n = 547 UR students and 157 MUHAS students.  
13  
14  
15  
16  
17  
18

19  
20  
21 **Figure 2: Predictor of UpToDate usage.** (A) shows the average daily usage (ADU) during the  
22 study period by UR students broken down by class year at enrollment. Students who did not log  
23 onto their accounts after enrolling into the study were assigned a daily topic viewing frequency  
24 of zero. n = 547 UR students.  
25  
26  
27  
28  
29

30  
31  
32  
33 **Figure 3: Changes in the usage of electronic resources.** Figures show the percentage of  
34 respondents who reported using a particular resource “almost every day” at enrollment and one  
35 year later at the time of annual evaluation. Shading added to highlight responses for UpToDate.  
36 (A) shows responses of UR users who had graduated at the time of annual evaluation and were  
37 practicing physicians. (B) shows responses of UR clinical students (Doc1 at time of enrollment)  
38 who were still in school at the time of annual evaluation. n = 62 UR graduates, and 66 UR  
39 students.  
40  
41  
42  
43  
44  
45  
46  
47  
48  
49

50  
51 **Figure 4: Impact of EBCR provision on class exam performance at UR.** (A) shows the  
52 average grades of graduating Doc4 students over time. Each dot represents one student and  
53  
54  
55  
56  
57  
58  
59  
60

1  
2  
3 shows the average of their grades in the following eight exams: written & clinical exams in  
4 internal medicine, pediatrics, obstetrics & gynecology, and surgery. (B) shows the average  
5 grades of students pre-UpToDate (2012-2015) and post-UpToDate (2016-2017). The p-value  
6 represents a two-sided heteroscedastic t-test. The error bars represent standard error of the mean.  
7  
8  
9  
10  
11  
12  
13

14 **Figure 5: EBCR utilization over time by UR students and faculty.** Lines show the average  
15 number of topics viewed per user per month by each user group. Only users who enrolled before  
16 03/01/16 are included in this analysis (n = 185 faculty, 70 Doc4 students). Call-outs are added to  
17 describe events in the careers of Doc4 students  
18  
19  
20  
21  
22  
23  
24  
25  
26  
27  
28  
29  
30  
31  
32  
33  
34  
35  
36  
37  
38  
39  
40  
41  
42  
43  
44  
45  
46  
47  
48  
49  
50  
51  
52  
53  
54  
55  
56  
57  
58  
59  
60

**Table 1**

|                         | <i>Coefficients</i> | <i>P-value</i>    |
|-------------------------|---------------------|-------------------|
| Cohort                  | -0.04               | 0.21              |
| Year at enrollment      | 0.12                | <b>&lt; 0.001</b> |
| Own any device          | 0.07                | 0.29              |
| Own smartphone          | -0.03               | 0.49              |
| Hours devoted to school | 0.00                | 0.91              |
| Google use frequency    | -0.02               | 0.30              |
| UpToDate use frequency  | 0.00                | 0.70              |

**Table 1: Multivariate linear regression with UpToDate usage as the dependent variable.**

The table shows a multivariable linear regression with average daily topic viewing frequency (natural logarithm transform) as the dependent variable. The dependent variable was calculated as “number of UpToDate topics viewed” / “days with an active subscription” for each user. It was set to zero for users who did not log on to UpToDate. The dependent variable was transformed with the equation  $Y' = \ln(Y+1)$  to approximate normality. The independent variables were set as follows: “Cohort” was set to 1 for students enrolling in 2015-2016 and 2 for student enrolling in 2016-2017. “Year at enrollment”: PCL1 was set to 1, PLC2 was set to 2, Doc1 was set to 3, Doc3 was set to 5 and Doc4 was set to 6. “Own any device” and “Own smartphone” were set to 0 if the student did not report ownership and to 1 if they did. “Hours devoted to school” is a sum of student reported hours spent in the classroom, in clinical activities, and on studying. “Google use frequency” and “UpToDate use frequency” were set based on student responses at the time of enrollment (before UpToDate subscriptions were given to them). They were set to 4 if student replied “almost every day”, 3 if “a few times per week”, 2 if “a few times per month”, 1 if “a few times per year” and 0 if “Never” or “I don’t know this resource.” P-value bolded if  $< 0.05$ .

**Table 2**

| Independent variable          | Partial SS | P-value            |
|-------------------------------|------------|--------------------|
| UpToDate offered <sup>b</sup> | 4197       | < 10 <sup>-4</sup> |
| Year of exam                  | 6196       | < 10 <sup>-4</sup> |

**Table 2: Two-way ANOVA with average Doc4 grade as dependent variable.** The table shows a two way ANOVA test with average Doc4 grade as dependent variable and year of exam and UpToDate provision as independent variables. n = 599 Doc4 students over 6 years.

<sup>b</sup> UpToDate offered was set to 0 for 2012-2015 and 1 for 2016-2017.

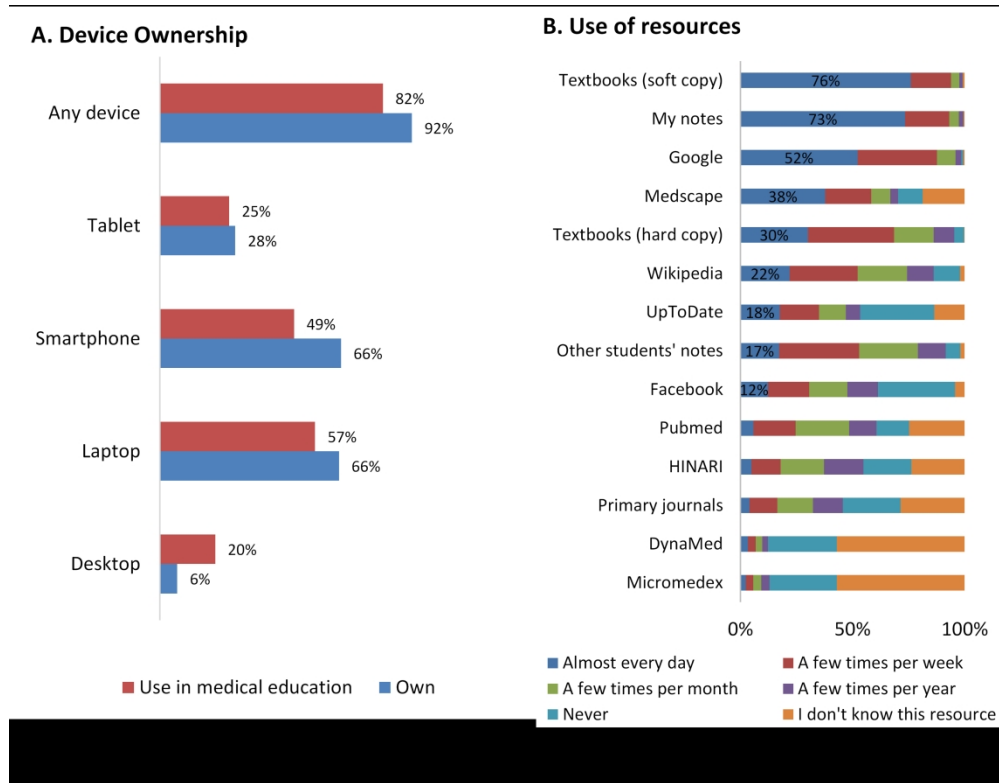

Figure 1: Baseline survey of Rwandan medical students. (A) shows the percentage of students at UR reporting that they own a particular internet-capable device or use it in medical education. "Any device" refers to any of the following: tablet, smartphone, laptop, desktop. (B) shows the percentage of students indicating that they use a specific resource to study for coursework or prepare for examinations. n = 547 UR students and 157 MUHAS students.



1  
2  
3  
4  
5  
6  
7  
8  
9  
10  
11  
12  
13  
14  
15  
16  
17  
18  
19  
20  
21  
22  
23  
24  
25  
26  
27  
28  
29  
30  
31  
32  
33  
34  
35  
36  
37  
38  
39  
40  
41  
42  
43  
44  
45  
46  
47  
48  
49  
50  
51  
52  
53  
54  
55  
56  
57  
58  
59  
60

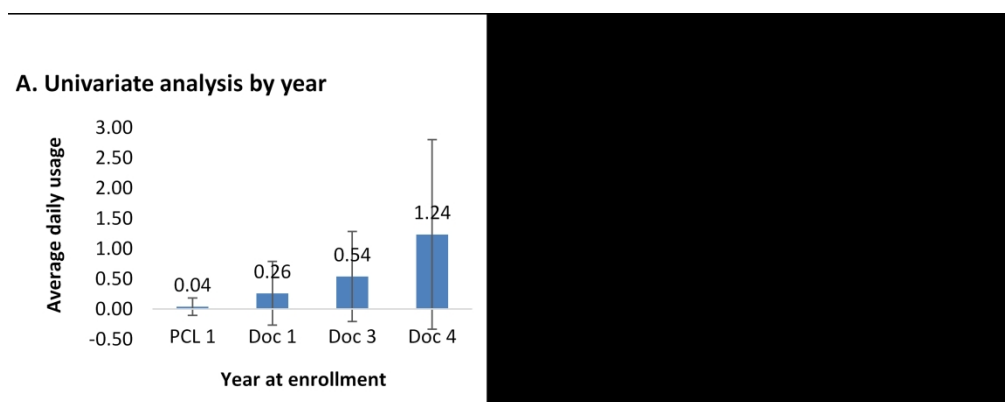

Figure 2: Predictor of UpToDate usage. (A) shows the average daily usage (ADU) during the study period by UR students broken down by class year at enrollment. Students who did not log onto their accounts after enrolling into the study were assigned a daily topic viewing frequency of zero. n = 547 UR students

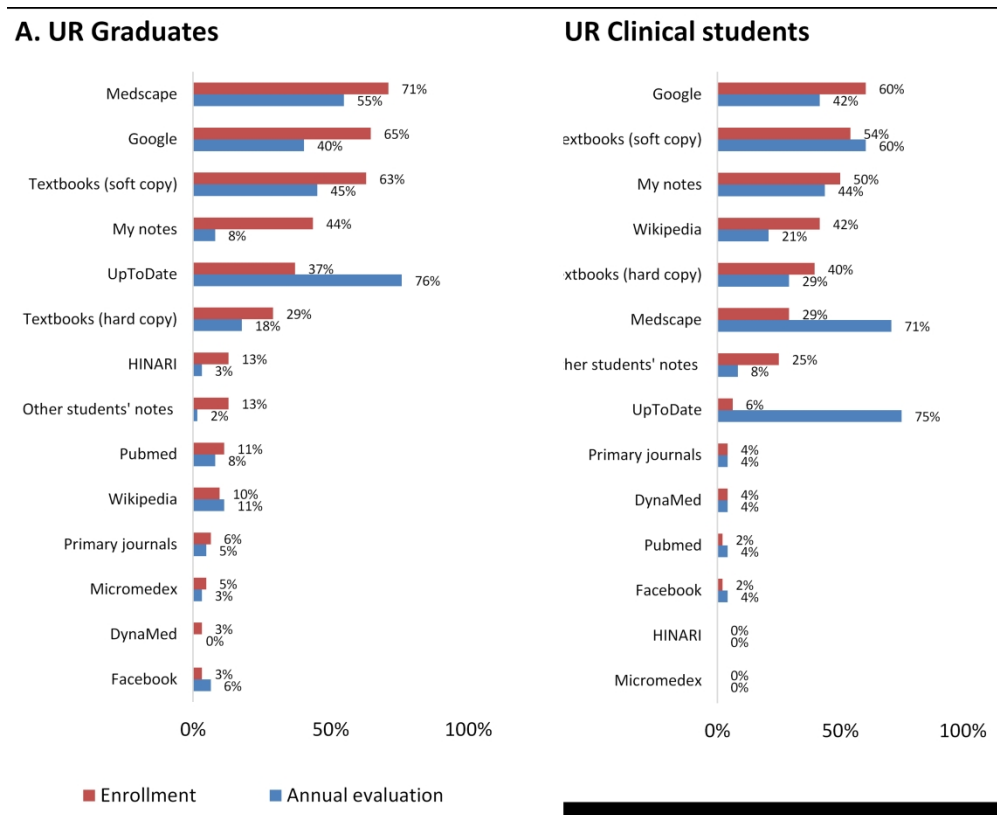

Figure 3: Changes in the usage of electronic resources. Figures show the percentage of respondents who reported using a particular resource "almost every day" at enrollment and one year later at the time of annual evaluation. Shading added to highlight responses for UpToDate. (A) shows responses of UR users who had graduated at the time of annual evaluation and were practicing physicians. (B) shows responses of UR clinical students (Doc1 at time of enrollment) who were still in school at the time of annual evaluation. n = 62 UR graduates, and 66 UR students.

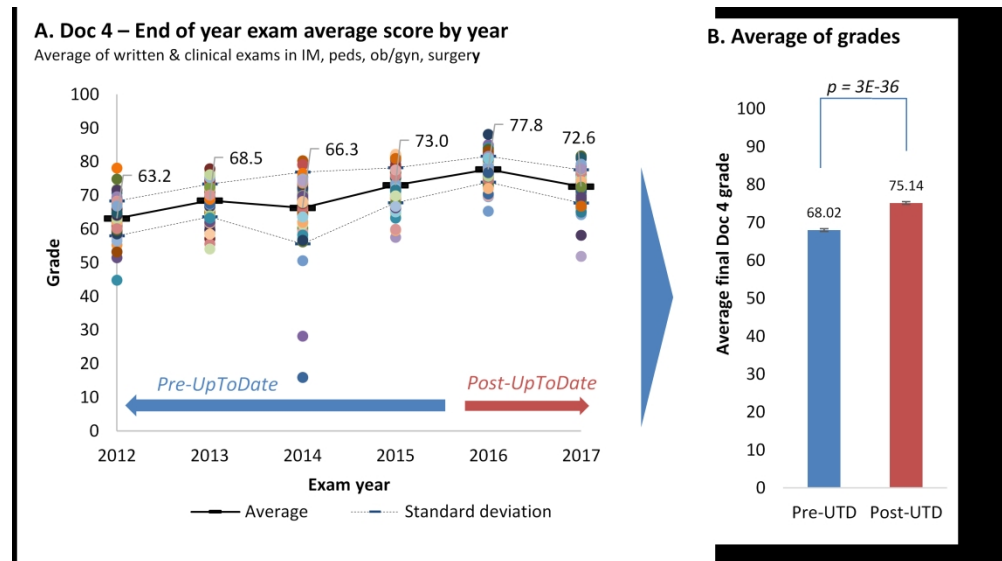

Figure 4: Impact of EBCR provision on class exam performance at UR. (A) shows the average grades of graduating Doc4 students over time. Each dot represents one student and shows the average of their grades in the following eight exams: written & clinical exams in internal medicine, pediatrics, obstetrics & gynecology, and surgery. (B) shows the average grades of students pre-UpToDate (2012-2015) and post-UpToDate (2016-2017). The p-value represents a two-sided heteroscedastic t-test. The error bars represent standard error of the mean.

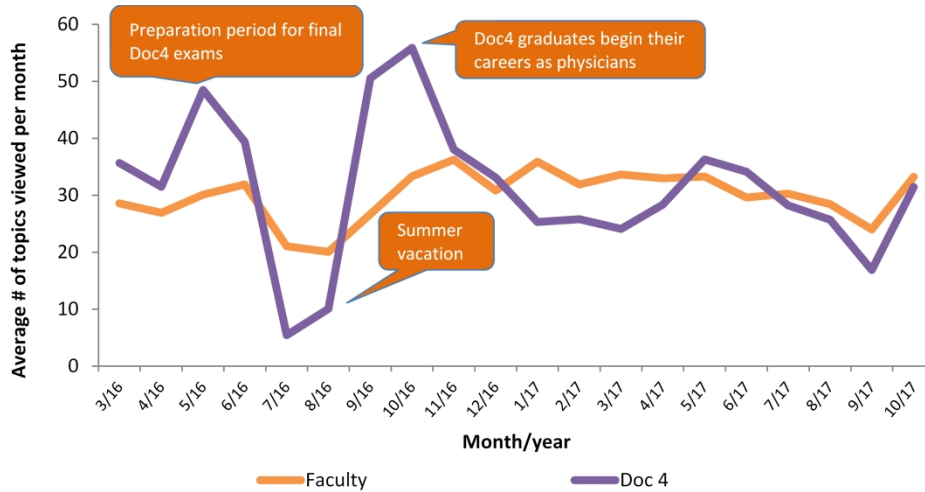

Figure 5: EBCR utilization over time by UR students and faculty. Lines show the average number of topics viewed per user per month by each user group. Only users who enrolled before 03/01/16 are included in this analysis (n = 185 faculty, 70 Doc4 students). Call-outs are added to describe events in the careers of Doc4 students

## Better evidence: Assessing the utility of an Evidence-Based Clinical Resource at the University of Rwanda

### Supplementary Appendix

#### Supplementary Appendix 1 – Supplementary Methods

##### Data analysis

To understand EBCR usage patterns by students and faculty, we calculated for each user the number of topics viewed. Any action resulting in the opening of a new UpToDate card (with a distinct title) was counted as a new topic. Viewing of the same topic in the same session was counted only once. A session was defined as the time period using UpToDate, initiated by a unique log-on of a user to the UpToDate website, mobile site, or mobile application and terminated when the user logged off, closed the application, or remained inactive for more than 3 hours. To calculate the average daily usage (ADU), the number of topics viewed was divided by the number of days that the user had an active account. The number of days with an active account was defined as the interval between the users' first-ever log-on and the end of the study period (10/31/2017). To identify predictors of high usage frequency, I conducted a multivariable linear regression after applying the natural log transform to ADU values to approximate normality.

To understand the impact of UpToDate on the overall exam performance of the graduating class at UR, we calculated the average grade of each graduating student for 2012-2017 by averaging their performance in all of their graduation exams. These were written and clinical exams in the following subjects: internal medicine, surgery, obstetrics & gynecology, and pediatrics. To assess the impact of UpToDate, I performed two tests: First, we performed a two-sided heteroscedastic t-test between grades assigned before UpToDate provision (2012-

1  
2  
3 2015) and grades assigned after (2016-2017). To control for variability due to the year of exam  
4  
5 administration, we performed a two-way Analysis of Variance (ANOVA) test with year of exam  
6  
7 and UpToDate provision as the independent variables and average exam grade as the dependent  
8  
9 variable.  
10  
11  
12  
13  
14  
15  
16  
17  
18  
19  
20  
21  
22  
23  
24  
25  
26  
27  
28  
29  
30  
31  
32  
33  
34  
35  
36  
37  
38  
39  
40  
41  
42  
43  
44  
45  
46  
47  
48  
49  
50  
51  
52  
53  
54  
55  
56  
57  
58  
59  
60

For peer review only

## Supplementary appendix 2: Participant enrolment

| Role           | Academic year                | Class at time of enrollment | Eligible    | Completing enrollment | % completing enrollment |
|----------------|------------------------------|-----------------------------|-------------|-----------------------|-------------------------|
| Students       | 2015-2016                    | PCL1 (1st year)             | 271         | 92                    | 34%                     |
|                |                              | Doc1 (3rd year)             | 125         | 90                    | 72%                     |
|                |                              | Doc4 (6th year)             | 86          | 84                    | 98%                     |
|                | 2016-2017                    | PCL1 (1st year)             | 102         | 24                    | 24%                     |
|                |                              | Doc1 (3rd year)             | 205         | 102                   | 50%                     |
|                |                              | Doc3 (5th year)             | 89          | 74                    | 83%                     |
|                |                              | Doc4 (6th year)             | 102         | 81                    | 79%                     |
|                | <b>Total - students</b>      |                             | <b>980</b>  | <b>547</b>            | <b>56%</b>              |
| <b>Faculty</b> | <b>Continuous enrollment</b> |                             | <b>1084</b> | <b>325</b>            | <b>29%</b>              |

**Supplementary Appendix 2: Participant enrollment.** Table shows the number of eligible students and faculty by role, academic year at time of enrollment, and class at time of enrollment. Table also shows the number of students and faculty who completed enrollment, and the percentage of eligible students who completed enrollment.

# BMJ Open

## Better evidence: A Prospective Cohort Study Assessing the utility of an Evidence-Based Clinical Resource at the University of Rwanda

|                                 |                                                                                                                                                                                                                                                                                                                                                                                                                                                                                                                                                                                                                                                                                                                                                                                                                                                                                                                                                                                                                                                             |
|---------------------------------|-------------------------------------------------------------------------------------------------------------------------------------------------------------------------------------------------------------------------------------------------------------------------------------------------------------------------------------------------------------------------------------------------------------------------------------------------------------------------------------------------------------------------------------------------------------------------------------------------------------------------------------------------------------------------------------------------------------------------------------------------------------------------------------------------------------------------------------------------------------------------------------------------------------------------------------------------------------------------------------------------------------------------------------------------------------|
| Journal:                        | <i>BMJ Open</i>                                                                                                                                                                                                                                                                                                                                                                                                                                                                                                                                                                                                                                                                                                                                                                                                                                                                                                                                                                                                                                             |
| Manuscript ID                   | bmjopen-2018-026947.R1                                                                                                                                                                                                                                                                                                                                                                                                                                                                                                                                                                                                                                                                                                                                                                                                                                                                                                                                                                                                                                      |
| Article Type:                   | Research                                                                                                                                                                                                                                                                                                                                                                                                                                                                                                                                                                                                                                                                                                                                                                                                                                                                                                                                                                                                                                                    |
| Date Submitted by the Author:   | 27-Feb-2019                                                                                                                                                                                                                                                                                                                                                                                                                                                                                                                                                                                                                                                                                                                                                                                                                                                                                                                                                                                                                                                 |
| Complete List of Authors:       | <p>Valtis, Yannis; Brigham and Women's Hospital Department of Medicine; Global Health Delivery Project at Harvard University<br/> Rosenberg, Julie; Global Health Delivery Project at Harvard University<br/> Wachter, Keri; Global Health Delivery Project at Harvard University; Harvard Medical School<br/> Kisenge, Rodrick; Muhimbili University of Health and Allied Sciences<br/> Mashili, Fredrick; Muhimbili University of Health and Allied Sciences<br/> Chande Mallya, Rehema; Muhimbili University of Health and Allied Sciences<br/> Walker, Timothy; University of Rwanda College of Medicine and Health Sciences<br/> Kabakambira, J. Damascene; NIDDK, Section on Ethnicity &amp; Health; University of Rwanda College of Medicine and Health Sciences<br/> Egide, Abahuje; University of Rwanda College of Medicine and Health Sciences<br/> Ntacyabukura, Blaise; University of Rwanda College of Medicine and Health Sciences<br/> Weintraub, Rebecca; Harvard Medical School; Global Health Delivery Project at Harvard University</p> |
| <b>Primary Subject Heading</b>: | Global health                                                                                                                                                                                                                                                                                                                                                                                                                                                                                                                                                                                                                                                                                                                                                                                                                                                                                                                                                                                                                                               |
| Secondary Subject Heading:      | Evidence based practice, Medical education and training                                                                                                                                                                                                                                                                                                                                                                                                                                                                                                                                                                                                                                                                                                                                                                                                                                                                                                                                                                                                     |
| Keywords:                       | MEDICAL EDUCATION & TRAINING, Information technology < BIOTECHNOLOGY & BIOINFORMATICS, GENERAL MEDICINE (see Internal Medicine), EBCR, global medical education                                                                                                                                                                                                                                                                                                                                                                                                                                                                                                                                                                                                                                                                                                                                                                                                                                                                                             |
|                                 |                                                                                                                                                                                                                                                                                                                                                                                                                                                                                                                                                                                                                                                                                                                                                                                                                                                                                                                                                                                                                                                             |

SCHOLARONE™  
Manuscripts



## Better evidence: A Prospective Cohort Study Assessing the utility of an Evidence-Based Clinical Resource at the University of Rwanda

Article

### Authors:

Yannis K. Valtis, MD <sup>1,2,3</sup>; Julie Rosenberg, MPH <sup>1,3</sup>; Keri Wachter, MPH <sup>1,4</sup>; Rodrick Kisenge, MD <sup>5</sup>; Fredirick Mashili, MD <sup>5</sup>; Rehema Chande-Mallya, PhD <sup>5</sup>; Tim Walker, MD <sup>6,7</sup>; Jean Damascene Kabakambira, MD <sup>7,8</sup>; Abahuje Egide, MD <sup>7</sup>; Blaise Ntacyabukura <sup>7</sup>, Rebecca L. Weintraub, MD <sup>1,2,3</sup>.

1. Global Health Delivery Project at Harvard University, Boston, MA.
2. Harvard Medical School, Boston, MA.
3. Brigham and Women's Hospital, Boston, MA.
4. Harvard T.H. Chan School of Public Health, Boston, MA.
5. Muhimbili University of Health and Allied Sciences, Dar es Salaam, Tanzania.
6. Calvary Mater Hospital, Newcastle, Australia.
7. University of Rwanda, Kigali, Rwanda.
8. National Institutes of Health, Bethesda, MD.

### Contact Information:

Correspondence should be addressed to Rebecca Weintraub, Brigham and Women's Hospital, Global Health Delivery Project, 75 Francis St, Boston, MA 02115; e-mail: [rebecca@globalhealthdelivery.org](mailto:rebecca@globalhealthdelivery.org).

## Abstract

**Objective:** Evidence-based clinical resources (EBCRs) have the potential to improve diagnostic and therapeutic accuracy. The majority of U.S. teaching medical institutions have incorporated them into clinical training. Many EBCRs are subscription-based, and their cost is prohibitive for most clinicians and trainees in low- and middle-income countries. We sought to determine the utility of EBCRs in an East African medical school.

**Setting:** The University of Rwanda (UR), a medical school located in East Africa.

**Participants:** Medical students and faculty members at UR.

**Interventions:** We offered medical students and faculty at UR free access to UpToDate, a leading EBCR and conducted a cohort study to assess its uptake and usage. Students completed two surveys on their study habits and gave us permission to access their activity on UpToDate and their grades.

**Results:** Of the 980 medical students invited to enroll over two years, 547 did (56%). Of eligible final-year students, 88% enrolled. At baseline, 92% of students reported ownership of an internet-capable device, and the majority indicated using free online resources frequently for medical education. Enrolled final-year students viewed, on average, 1.24 topics per day and continued to use UpToDate frequently after graduation from medical school. Graduating class exam performance was better after introduction of UpToDate than in previous years.

**Conclusions:** Removal of the cost barrier was sufficient to generate high uptake of a leading EBCR by senior medical students and habituate them to continued usage after graduation.

### Strengths and limitations of this study

- This is the first reported longitudinal prospective cohort study of health professionals and trainees in Africa.
- This is the first study to link usage of online educational resources to performance in medical school examinations in Africa.
- Our ability to precisely track online usage of UpToDate eliminates recall bias that is likely to significantly impact findings of studies of educational interventions that are based on self-reporting.
- Given the observational nature of our study, we cannot make causal claims on the relationship between student use of UpToDate and their performance on medical school examinations.
- The relatively short follow-up period discussed in this paper limits our ability to understand the long term impact of offering UpToDate access to African health trainees.

## Introduction

The velocity of growth of the clinical evidence base is staggering: In the last three years alone, over 16,000 unique clinical studies posted new results on ClinicalTrials.gov.<sup>1</sup> There is more information emerging every year than any one person could ever retain. In response, educators in the United States (U.S.) have called for a shift in the basic paradigm of medical education, de-emphasizing the passive presentation of material and promoting problem-solving skills and the ability to find information and adapt it to the clinical situation at hand.<sup>2</sup> The Liaison Committee on Medical Education (LCME) mandates that self-directed learning be part of every accredited school's curriculum, and the American Board of Internal Medicine recently announced that maintenance of certification exams for internists and nephrologists will be open-book.<sup>3,4</sup> The historical focus on memorization is giving way to an emphasis on knowing how to find information, synthesize it, and apply it clinically. Clinicians who have not developed these skills during medical school or clinical training are at a disadvantage, which, ultimately, means their patients are at a disadvantage.<sup>5, 6, 7</sup>

The ability to access and synthesize clinical information effectively and efficiently is particularly crucial for clinicians in low- and middle-income countries (LMICs). The health workforce shortage and absence of specialists forces clinicians to care for more patients with a broader range of complaints than their counterparts in high-income countries. Rwanda, a country of 11 million people, had, until recently, a total of 15 anesthesiologists, 25 obstetricians, and zero neurologists.<sup>8,9</sup> In addition, a study of 21 hospitals in LMICs documented substantial knowledge gaps among physicians.<sup>10</sup> Constraints in medical education in these countries are likely responsible for both workforce and knowledge gaps. In 2011, the Sub-Saharan African Medical

1  
2  
3 School Study group surveyed 146 of 168 medical schools in the region and found widespread  
4 shortages in qualified faculty and infrastructure.<sup>11</sup>  
5  
6

7 To address the challenge of the rapidly expanding evidence base in medicine, several  
8 organizations in high-income countries have created evidence-based clinical resources (EBCRs)  
9  
10 – regularly updated, expert-authored, online tools that synthesize the primary literature to guide  
11 clinical decision making. Over the years, UpToDate, which was founded at Harvard Medical  
12 School in 1992, has emerged as a leading EBCR in high-income countries, and several studies  
13 have documented its utility: Use of UpToDate has been associated with improved examination  
14 performance among internal medicine residents, as well as lower mortality at U.S. hospitals.<sup>5-6</sup>  
15  
16 As of February 2018, 90% of teaching U.S. medical institutions and 100% of the top 20 U.S.  
17 medical schools (as ranked by U.S. News & World Report) subscribed to UpToDate.<sup>12,13,14</sup>  
18  
19

20 Despite the high demand for UpToDate in U.S. medical education, none of the 168 medical  
21 schools in sub-Saharan Africa subscribe to its services, partly because of the high subscription  
22 cost. An individual physician subscription to UpToDate in Rwanda costs \$299 per year; Rwanda  
23 spent \$52 per capita on healthcare in 2014.<sup>15</sup> Additionally, cost of internet access can be  
24 prohibitively high in some LMICs; at the time of publication, mobile internet in Rwanda cost  
25 approximately \$0.05 per megabyte.<sup>16</sup>  
26  
27

28 Given their utility in high-income countries, access to EBCRs could help address some of the  
29 challenges faced by clinicians in LMICs. We believe that access to better evidence could  
30 improve the knowledge base of these clinicians, increase their perception of self-efficacy, and  
31 create a professional habit of seeking evidence at the point of care. This could be particularly  
32 beneficial for clinicians caring for a large number of complex patients without access to  
33 specialists. We have previously reported on a program which provides donated UpToDate  
34  
35  
36  
37  
38  
39  
40  
41  
42  
43  
44  
45  
46  
47  
48  
49  
50  
51  
52  
53  
54  
55  
56  
57  
58  
59  
60

1  
2  
3 subscriptions to clinicians in LMICs, in which we found that most use UpToDate with high  
4 frequency and many report changing their clinical decision making as a result of having access to  
5 UpToDate.<sup>17</sup>  
6  
7

8  
9  
10 While EBCRs have traditionally been developed for physicians in practice, there are reasons to  
11 believe that their introduction to medical students would be beneficial. First, medical school is *de*  
12 *facto* the first locus of professional habit formation, and often their last formal one, as many  
13 clinicians in LMICs do not receive post-graduate education. Additionally, providing access to  
14 EBCRs to medical students in LMICs is a matter of equity: students who have worked hard to  
15 care for their community in LMICs should have the same opportunity to learn and provide  
16 quality care as their counterparts in U.S. medical schools. In this article, we hypothesized that  
17 removing the cost barrier to accessing EBCR will lead to high student uptake and possibly lead  
18 to an improvement in educational outcomes.  
19  
20  
21  
22  
23  
24  
25  
26  
27  
28  
29  
30  
31  
32

## 33 **Methods**

### 34 Setting

35  
36 The University of Rwanda (UR) was the only medical degree-granting school in Rwanda at the  
37 time this study launched and is a public university. 76% of students at UR are recipients of  
38 bursaries from the Government of Rwanda.<sup>18</sup> Medical students enter UR after successful  
39 completion of high school and, during the study period, completed a 6-year medical education  
40 curriculum consisting of two years of pre-clinical education followed by 4 years of clinical  
41 education in the wards.  
42  
43  
44  
45  
46  
47  
48  
49  
50

### 51 Intervention

1  
2  
3 In the fall of 2014, the authors formed an agreement with Wolters Kluwer, the parent company  
4 of UpToDate, to facilitate the donations of UpToDate subscriptions to medical students in sub-  
5  
6 Saharan Africa. With appropriate IRB approval, medical students and faculty at the University of  
7  
8 Rwanda were invited by email to enroll in our study. “Faculty member” was defined as anyone  
9  
10 who teaches undergraduate medical students, which meant that residents, as well as staff  
11  
12 physicians, were considered faculty. Undergraduate medical students, who unlike U.S. medical  
13  
14 students are admitted to medical school after high school at age 18, were invited to enroll as  
15  
16 well. Students were invited in cohorts that spanned the different years of medical school (see  
17  
18 Supplementary Table 1). Enrollment was voluntary and not mandated by faculty or the  
19  
20 curriculum. Each participant received a free 5-year individual subscription to UpToDate, which  
21  
22 allowed them to access the website from any computer or mobile device. The authors undertook  
23  
24 no recruitment or training efforts. Data reported in this paper was generated in 2015–2017. Of  
25  
26 note, all participants in the study will be able to apply for an annually renewable, indefinite,  
27  
28 donated subscription to UpToDate after the completion of the study.  
29  
30  
31  
32  
33  
34

### 35 Evaluation

36  
37 Students were asked to complete an online baseline survey to document their study habits before  
38  
39 provision of UpToDate and an Annual Evaluation survey. We chose questions around students’  
40  
41 baseline utilization of the Internet in medical education, as others have identified access to  
42  
43 devices and the Internet as potential barriers to EBCR utilization.<sup>19</sup> Students’ responses over time  
44  
45 were linked using their name and email. All participant activity on the UpToDate website and  
46  
47 mobile application was tracked remotely and linked to survey responses. An anonymized dataset  
48  
49 of all student grades for the graduating classes of 2012-2017 was obtained to assess the impact of  
50  
51 UpToDate on class examination performance. Lastly, to understand student usage of UpToDate  
52  
53  
54  
55  
56  
57  
58  
59  
60

1  
2  
3 over time, we plotted the average number of topics viewed per month by active users. To  
4  
5 characterize a stable cohort of users over time, we plotted the average number of topics viewed  
6  
7 by students in their final year who enrolled before March 1<sup>st</sup> 2016.  
8  
9

### 10 Data analysis

11  
12 To understand EBCR usage patterns by students and faculty, we calculated for each user  
13  
14 the number of topics viewed. Any action resulting in the opening of a new UpToDate card (with  
15  
16 a distinct title) was counted as a new topic. Viewing of the same topic in the same session was  
17  
18 counted only once. A session was defined as the time period using UpToDate, initiated by a  
19  
20 unique log-on of a user to the UpToDate website, mobile site, or mobile application and  
21  
22 terminated when the user logged off, closed the application, or remained inactive for more than  
23  
24 three hours. To calculate the average daily usage (ADU), the number of topics viewed was  
25  
26 divided by the number of days that the user had an active account. The number of days with an  
27  
28 active account was defined as the interval between the users' first-ever log-on and the end of the  
29  
30 study period (10/31/2017). To identify predictors of high usage frequency, we conducted a  
31  
32 multivariable linear regression after applying the natural log transform to ADU values to  
33  
34 approximate normality.  
35  
36  
37  
38  
39

40 To understand the impact of UpToDate on the overall exam performance of the  
41  
42 graduating class at UR, we calculated the average grade of each graduating student for 2012-  
43  
44 2017 by averaging their performance in all of their graduation exams. These were written and  
45  
46 clinical exams in the following subjects: internal medicine, surgery, obstetrics & gynecology,  
47  
48 and pediatrics. To assess the impact of UpToDate, we performed two tests: First, we performed a  
49  
50 two-sided heteroscedastic t-test between grades assigned before UpToDate provision (2012-  
51  
52 2015) and grades assigned after (2016-2017). To control for variability due to the year of exam  
53  
54  
55  
56  
57  
58  
59  
60



1  
2  
3 administration, we performed a two-way Analysis of Variance (ANOVA) test with year of exam  
4 and UpToDate provision as the independent variables and average exam grade as the dependent  
5  
6 variable.  
7  
8

9  
10 Data analysis was performed on Stata SE 14 and Microsoft Excel.

### 11 Patient and public involvement

12  
13  
14 Patients were not the subject of this study. Given the setting of the study at a medical school, it  
15 was not feasible to include a patient partner. A medical student at UR (BN) is a co-author of this  
16  
17 study and brought the student perspective into the interpretation of the data.  
18  
19  
20

### 21 **Results**

22  
23  
24 Of the 980 students and 1,084 faculty invited to enroll into the study during the 2015-2017 study  
25  
26 period, 547 (56%) students and 325 (29%) faculty did. The highest enrollment rate (87%) was  
27  
28 observed among students in their final (sixth) year of medical school, who are called “Doctorate  
29  
30 4” or Doc4 students at UR (Supplementary Table 1). In our baseline survey, 92% of student  
31  
32 respondents overall and 96% of Doc4 students reported ownership of at least one internet-  
33  
34 capable device (Figure 1a). Free electronic resources—primarily Medscape, Google, and  
35  
36 Wikipedia—were used frequently for the purposes of medical education (Figure 1b). A small  
37  
38 percentage reported frequent usage of UpToDate at baseline.  
39  
40

41  
42 All users who completed the enrollment survey had an individual UpToDate account created for  
43  
44 them and received an email with instructions on how to set up their UpToDate password. Of  
45  
46 those who activated their UpToDate account, 76% of faculty and 64% of students viewed, on  
47  
48 average, at least one UpToDate topic per week; 13% of faculty and 23% of students viewed, on  
49  
50 average, one topic or more per day. In a multivariate linear regression looking at variables  
51  
52  
53  
54  
55  
56  
57  
58  
59  
60

1  
2  
3 associated with UpToDate usage frequency, student year at enrollment was the only significantly  
4 associated variable (Table 1) . Figure 2 shows average UpToDate usage by year of student at  
5 enrollment.  
6  
7  
8  
9

10 One year after enrollment, 52% of students completed the annual evaluation; 74% of Doc4  
11 students did so. The low response rates could be attributed to lack of positive incentives to  
12 complete the survey or to students not checking their email to see that the evaluation survey was  
13 due. Both graduates, who had enrolled into the study as Doc4 students, and continuing students  
14 reported increased usage of UpToDate. Continuing students also reported decreased use of  
15 Google and Wikipedia (Figure 3).  
16  
17  
18  
19  
20  
21  
22  
23

24 To assess the effect of providing UpToDate to students on their educational performance, we  
25 plotted the average grades of each graduating class from 2012 to 2017 (599 students in total) and  
26 compared the pre-UpToDate period (2012-2015; average grade 68) to the post-UpToDate period  
27 (2016-2017; average grade 75) (Figure 4). Both a simple t-test as well as a two-way ANOVA  
28 showed a statistically significant difference (Table 2). In 2017, a student who scored 68 would  
29 have ranked at the 16<sup>th</sup> percentile of the class, while a student scoring 75 would have ranked at  
30 the 66<sup>th</sup> percentile.  
31  
32  
33  
34  
35  
36  
37  
38  
39

40 We used remote tracking to assess Doc4 student usage over time and found that it spiked in May  
41 2016, as students prepared for their graduation exams in June. Usage fell significantly during  
42 summer vacation, but rose again in September and October, as the new graduates began their  
43 careers as physicians, either in residency or in independent practice. A similar pattern of usage  
44 over time was seen among faculty (Figure 5).  
45  
46  
47  
48  
49  
50  
51  
52  
53

## 54 **Discussion**

55  
56  
57  
58  
59  
60

1  
2  
3 Our findings represent the first prospective cohort study of medical students in Africa and  
4 suggest that access to devices and the internet might not be a significant barrier for African  
5 medical students wishing to access online resources. Our findings align with observations from a  
6 2016 study in Zimbabwe and contrast two earlier studies in Nigeria published in 2004 and 2008  
7 that suggest lack of access to internet.<sup>20,21,22</sup> The differences might be related to the passage of  
8 time or resource availability differences between Rwanda and Nigeria. The findings suggest that,  
9 in Rwanda, our focus should not be on securing devices but on securing access to the latest  
10 online tools and evidence.  
11

12 Our study also shows that students, especially final-year students, used a leading EBCR  
13 frequently when the cost barrier was removed. This was achieved with no provision of internet-  
14 capable devices, no subsidizing of mobile internet data, no dedicated training activities on EBCR  
15 use or evidence searching, and no curricular integration of EBCRs. Overall, our findings suggest  
16 that removing the cost barrier to access of EBCRs can generate uptake among a subset of  
17 medical students in East Africa. The low uptake of UpToDate by pre-clinical UR students could  
18 be related to the basic science focus of their curriculum, which makes UpToDate's clinical  
19 content less relevant.  
20

21 The introduction of an EBCR during the last year of medical school may lead to habit formation.  
22 Among students receiving an EBCR subscription in their final year, usage was sustained for the  
23 one and a half year period monitored after graduation. Additionally, self-reported usage of non-  
24 validated sources such as Google and Wikipedia fell among students within a year of UpToDate  
25 provision. In 2013, Gawande argued that habit change and formation in healthcare is a complex  
26 process that can often take decades.<sup>23</sup> He also argued that some habits form quickly and that  
27 those might be the ones that make a physician's workflow faster and more efficient. Our study  
28  
29  
30  
31  
32  
33  
34  
35  
36  
37  
38  
39  
40  
41  
42  
43  
44  
45  
46  
47  
48  
49  
50  
51  
52  
53  
54  
55  
56  
57  
58  
59  
60

1  
2  
3 suggests that UpToDate may fall into this category of tools and habits that facilitate faster, more  
4  
5 efficient work.  
6

7  
8 The temporal association of free access to UpToDate with an improvement of the overall  
9  
10 examination performance of the graduating class may be causal or due to another explanation, as  
11  
12 discussed below. It is consistent, however, with previous reports of associations between  
13  
14 UpToDate usage and performance in exams by residents in the U.S. and Japan, and practicing  
15  
16 physicians in the U.S.  
17

### 18 19 Limitations

20  
21 Our study is subject to selection bias given its observational nature. It is possible that students  
22  
23 with regular access to email were more likely to respond to our email-based invitation, thus  
24  
25 biasing the response set, especially with respect to use of electronic resources and internet  
26  
27 access. The high enrollment rate among Doc4 students mitigates this effect to some extent.  
28  
29

30  
31 The use of a historical control to assess the impact of UpToDate's introduction on student grades  
32  
33 also has several limitations. First, no causal arguments can be made, given the fact that different  
34  
35 exams were used each year and different students took them. While UpToDate may have helped  
36  
37 students prepare for their exams more efficiently and increase their knowledge base, it is also  
38  
39 possible that the exams in 2016 and 2017 were easier than those of years past or that the students  
40  
41 were independently academically superior to the previous classes. The cause of the overall  
42  
43 increase in student scores before UpToDate was introduced is unclear and could be related to  
44  
45 changes in educational methods or examinations, although we do not have evidence for either of  
46  
47 those. In addition, the reason for the decline in of students' scores from 2016 to 2017 is  
48  
49 unknown, and could be statistically random or indicative of a trend. Further follow up will be  
50  
51 required to answer this question.  
52  
53  
54  
55  
56  
57  
58  
59  
60

1  
2  
3 Second, it is possible that test answers may not be contained/addressed in UpToDate, although  
4  
5 the UR faculty among the authors of this paper do not believe that to be the case.  
6

### 7 8 Next steps

9  
10 Due to its longitudinal nature, this study has the potential to offer additional insights on the  
11  
12 changes in learning behaviors of African health trainees over time. Qualitative research on this  
13  
14 student cohort could help elucidate the drivers of different study behaviors, and the perceived  
15  
16 impact of resources such as UpToDate on clinician's knowledge base and self-efficacy.  
17

18  
19 Future research might explore other EBCRs and features that impact uptake and utility. We  
20  
21 focused on UpToDate because of the body of literature that supports its value in high-income  
22  
23 countries. However, we hypothesize that a suite of EBCRs and learning tools, possibly in  
24  
25 multiple languages, might be helpful for trainees in LMICs. Given the relatively easy scalability  
26  
27 of software-based tools, we believe that we can continue to decrease the barriers for trainees in  
28  
29 LMICs to access the best available evidence at the frontline of care delivery. Our vision is that  
30  
31 this work can prepare and inform how the next generation of clinicians in LMICs practices  
32  
33 evidence-based medicine. Although our research focused on LMICs, disparities in access to  
34  
35 high-quality EBCRs might exist within U.S. medical education as well, which can also be an  
36  
37 area of future research and programming. As medicine continues to evolve rapidly and medical  
38  
39 education shifts its focus from memorization to critical processing of information, we must  
40  
41 ensure that all learners have equitable access to the best information available.  
42  
43  
44  
45  
46  
47  
48

49 **Acknowledgements:** The authors wish to thank Dr. Peter Bonis, Dr. Denise Basow, Denise  
50  
51 Gilpin, Dr. Ellie Baron, Becky Mueller, and Bin Cao at Wolters Kluwer for their generous  
52  
53 support of this work. They would also like to thank Marie Teichman, Teresa Oszkinis, Elissa  
54  
55  
56  
57  
58

1  
2  
3 Dakers and Fatima Fairfax for logistical support of this study. Lastly, the authors wish to thank  
4  
5 Kate Miller and Dr. Shelley Hurwitz for statistical expertise and guidance.<sup>a</sup>  
6  
7  
8  
9

10 **Funding:** Wolters Kluwer donated the free UpToDate subscriptions. Y.K. Valtis received  
11  
12 funding from the Alexander Onassis Foundation, the Harvard Medical School Abundance Fund,  
13  
14 and the Scholars In Medicine Office at Harvard Medical School. Global Health Delivery staff  
15  
16 were supported by the Abundance Fund. Wolters Kluwer did not provide any monetary support  
17  
18 to this study.  
19  
20  
21  
22  
23

24 **Competing interests:** None declared  
25  
26  
27

28 **Ethical Approval:** The research described here was approved by the Harvard Medical School  
29  
30 Longwood Medical Area Institutional Review Board and the College of Medicine and Health  
31  
32 Sciences University of Rwanda Institutional Review Board.  
33  
34  
35  
36  
37

38 **Data sharing:** No data are available.  
39  
40  
41

42 **Contributorship:** YV, JR, KW, RK, FM, RCM, TW, RW designed the study and co-wrote its  
43  
44 protocol. JDK, AE, BN implemented the study at the University of Rwanda. YV analyzed the  
45  
46

---

47  
48 <sup>a</sup> This work was conducted with support from Harvard Catalyst, The Harvard Clinical and  
49  
50 Translational Science Center (National Center for Research Resources and the National Center  
51  
52 for Advancing Translational Sciences, National Institutes of Health Award UL1 TR001102), and  
53  
54 financial contributions from Harvard University and its affiliated academic healthcare centers.  
55  
56 The content is solely the responsibility of the authors and does not necessarily represent the  
57  
58 official views of Harvard Catalyst, Harvard University and its affiliated academic healthcare  
59  
60 centers, or the National Institutes of Health.

1  
2  
3  
4  
5  
6  
7  
8  
9  
10  
11  
12  
13  
14  
15  
16  
17  
18  
19  
20  
21  
22  
23  
24  
25  
26  
27  
28  
29  
30  
31  
32  
33  
34  
35  
36  
37  
38  
39  
40  
41  
42  
43  
44  
45  
46  
47  
48  
49  
50  
51  
52  
53  
54  
55  
56  
57  
58  
59  
60

data and drafted this manuscript. All authors edited the manuscript. RW oversaw the entire design, implementation, and analysis of the study.

For peer review only

---

## References

<sup>1</sup> ClinicalTrials.gov [Internet]. U.S. National Institutes of Health. Trends, Charts, and Maps; 2017 [cited 2018 Jan 12]. Available from:

<https://clinicaltrials.gov/ct2/resources/trends#RegisteredStudiesOverTime>

<sup>2</sup> Schwartzstein RM, Roberts DH. Saying Goodbye to Lectures in Medical School - Paradigm Shift or Passing Fad? *N Engl J Med*. 2017 Aug 17;377(7):605-607. doi:

10.1056/NEJMp1706474. PubMed PMID: 28813217.

<sup>3</sup> Weinberger SE. Opening the Book on Maintenance of Certification. *Ann Intern Med*. 2017 Sep 5;167(5):353-354. doi: 10.7326/M17-1853. Epub 2017 Aug 15. PubMed PMID: 28806790.

<sup>4</sup> LCME Website [Internet]. Liaison Committee on Medical Education. Functions and Structure of a Medical School; 2016 [cited 2018 Jan 12]. Available from: <http://lcme.org/publications/>

<sup>5</sup> Mullan F, Frehywot S, Omaswa F, Buch E, Chen C, Greysen SR, Wassermann T, Abubakr DE, Awases M, Boelen C, Diomande MJ, Dovlo D, Ferro J, Haileamlak A, Iputo J, Jacobs M, Koumaré AK, Mipando M, Monekosso GL, Olapade-Olaopa EO, Rugarabamu P, Sewankambo NK, Ross H, Ayas H, Chale SB, Cyprien S, Cohen J, Haile-Mariam T, Hamburger E, Jolley L, Kolars JC, Kombe G, Neusy AJ. Medical schools in sub-Saharan Africa. *Lancet*. 2011 Mar 26;377(9771):1113-21. doi: 10.1016/S0140-6736(10)61961-7. Epub 2010 Nov 10. Erratum in: *Lancet*. 2011 Mar 26;377(9771):1076. PubMed PMID: 21074256.



- 1  
2  
3  
4  
5  
6  
7  
8  
9  
10  
11  
12  
13  
14  
15  
16  
17  
18  
19  
20  
21  
22  
23  
24  
25  
26  
27  
28  
29  
30  
31  
32  
33  
34  
35  
36  
37  
38  
39  
40  
41  
42  
43  
44  
45  
46  
47  
48  
49  
50  
51  
52  
53  
54  
55  
56  
57  
58  
59  
60
- 
- <sup>6</sup> McDonald FS, Zeger SL, Kolars JC. Factors associated with medical knowledge acquisition during internal medicine residency. *J Gen Intern Med.* 2007 Jul;22(7):962-8. Epub 2007 Apr 28. PubMed PMID: 17468889; PubMed Central PMCID: PMC2219722.
- <sup>7</sup> Shimizu T, Nemoto T, Tokuda Y. Effectiveness of a clinical knowledge support system for reducing diagnostic errors in outpatient care in Japan: A retrospective study. *Int J Med Inform.* 2018 Jan;109:1-4. doi: 10.1016/j.ijmedinf.2017.09.010. Epub 2017 Sep 25. PubMed PMID: 29195700.
- <sup>8</sup> Holmer H, Lantz A, Kunjumen T, Finlayson S, Hoyler M, Siyam A, Montenegro H, Kelley ET, Campbell J, Cherian MN, Hagander L. Global distribution of surgeons, anaesthesiologists, and obstetricians. *Lancet Glob Health.* 2015 Apr 27;3 Suppl 2:S9-11. doi: 10.1016/S2214-109X(14)70349-3. PubMed PMID: 25926323.
- <sup>9</sup> Bower JH, Zenebe G. Neurologic services in the nations of Africa. *Neurology.* 2005 Feb 8;64(3):412-5. PubMed PMID: 15699367.
- <sup>10</sup> Nolan T, Angos P, Cunha AJ, Muhe L, Qazi S, Simoes EA, Tamburlini G, Weber M, Pierce NF. Quality of hospital care for seriously ill children in less-developed countries. *Lancet.* 2001 Jan 13;357(9250):106-10. PubMed PMID: 11197397.

1  
2  
3  
4  
5  
6  
7  
8  
9  
10  
11  
12  
13  
14  
15  
16  
17  
18  
19  
20  
21  
22  
23  
24  
25  
26  
27  
28  
29  
30  
31  
32  
33  
34  
35  
36  
37  
38  
39  
40  
41  
42  
43  
44  
45  
46  
47  
48  
49  
50  
51  
52  
53  
54  
55  
56  
57  
58  
59  
60

---

<sup>11</sup> Mullan F, Frehywot S, Omaswa F, Buch E, Chen C, Greysen SR, Wassermann T, Abubakr DE, Awases M, Boelen C, Diomande MJ, Dovlo D, Ferro J, Haileamlak A, Iputo J, Jacobs M, Koumaré AK, Mipando M, Monekosso GL, Olapade-Olaopa EO, Rugarabamu P, Sewankambo NK, Ross H, Ayas H, Chale SB, Cyprien S, Cohen J, Haile-Mariam T, Hamburger E, Jolley L, Kolars JC, Kombe G, Neusy AJ. Medical schools in sub-Saharan Africa. *Lancet*. 2011 Mar 26;377(9771):1113-21. doi: 10.1016/S0140-6736(10)61961-7. Epub 2010 Nov 10. Erratum in: *Lancet*. 2011 Mar 26;377(9771):1076. PubMed PMID: 21074256.

<sup>12</sup> UpToDate website [Internet]. Wolters Kluwer. Editorial; 2017 [cited 2018 Jan 12]. Available from: <https://www.uptodate.com/home/editorial>

<sup>13</sup> US News & World Report Website [Internet]. US News & World. 2018 Best Medical Schools: Research; 2017 [cited 2018 Jan 12]. Available from: <https://www.usnews.com/best-graduate-schools/top-medical-schools/research-rankings?int=af3309&int=b3b50a&int=b14409>

<sup>14</sup> Personal Communication. Top 20 US Research Medical Schools, as ranked by US News & World Report in 2017 were contacted by email and asked whether they offer UpToDate access to their medical students.

<sup>15</sup> World Bank Website [Internet]. The World Bank. Health Expenditure per capita; 2017 [cited 2018 Jan 12]. Available from: <https://data.worldbank.org/indicator/SH.XPD.PCAP>

1  
2  
3  
4  
5  
6  
7  
8  
9  
10  
11  
12  
13  
14  
15  
16  
17  
18  
19  
20  
21  
22  
23  
24  
25  
26  
27  
28  
29  
30  
31  
32  
33  
34  
35  
36  
37  
38  
39  
40  
41  
42  
43  
44  
45  
46  
47  
48  
49  
50  
51  
52  
53  
54  
55  
56  
57  
58  
59  
60

---

<sup>16</sup> MTN Website [Internet]. MTN. MTN Mobile Internet; 2019 [cited 2019 Feb 19]. Available from: [http://www.mtn.co.rw/Content/Pages/79/MTN\\_Mobile\\_Internet](http://www.mtn.co.rw/Content/Pages/79/MTN_Mobile_Internet)

<sup>17</sup> Valtis YK, Rosenberg J, Bhandari S, Wachter K, Teichman M, Beauvais S, Weintraub R. Evidence-based medicine for all: what we can learn from a programme providing free access to an online clinical resource to health workers in resource-limited settings. *BMJ Glob Health*. 2016 May 23;1(1):e000041. doi: 10.1136/bmjgh-2016-000041. eCollection 2016. PubMed PMID: 28588926; PubMed Central PMCID: PMC5321332.

<sup>18</sup> UR Website [Internet]. University of Rwanda Planning M&E Unit. Facts and Figures; 2017 [cited 2018 Jan 12]. Available from: <http://ur.ac.rw/sites/default/files/Facts%20and%20Figures-2017-Final%20to%20be%20published.pdf#overlay-context=>

<sup>19</sup> Mazloomdoost D, Mehregan S, Mahmoudi H, Soltani A, Embi PJ. Perceived barriers to information access among medical residents in Iran: obstacles to answering clinical queries in settings with limited Internet accessibility. *AMIA Annu Symp Proc*. 2007 Oct 11:523-7. PubMed PMID: 18693891; PubMed Central PMCID: PMC2655820

<sup>20</sup> Bello IS, Arogundade FA, Sanusi AA, Ezeoma IT, Abioye-Kuteyi EA, Akinsola A. Knowledge and utilization of Information Technology among health care professionals and students in Ile-Ife, Nigeria: a case study of a university teaching hospital. *J Med Internet Res*. 2004 Dec 17;6(4):e45. PubMed PMID: 15631969; PubMed Central PMCID: PMC1550621.

1  
2  
3  
4  
5  
6  
7  
8  
9  
10  
11  
12  
13  
14  
15  
16  
17  
18  
19  
20  
21  
22  
23  
24  
25  
26  
27  
28  
29  
30  
31  
32  
33  
34  
35  
36  
37  
38  
39  
40  
41  
42  
43  
44  
45  
46  
47  
48  
49  
50  
51  
52  
53  
54  
55  
56  
57  
58  
59  
60

---

<sup>21</sup> Odusanya OO, Bamgbala OA. Computing and information technology skills of final year medical and dental students at the College of Medicine University of Lagos. Niger Postgrad Med J. 2002 Dec;9(4):189-93. PubMed PMID: 12690677.

<sup>22</sup> Parve S, Ershadi A, Karimov A, Dougherty A, Ndhlovu CE, Chidzonga MM, Sadigh M. Access, attitudes and training in information technologies and evidence-based medicine among medical students at University of Zimbabwe College of Health Sciences. Afr Health Sci. 2016 Sep;16(3):860-865. PubMed PMID: 27917222; PubMed Central PMCID: PMC5111979.

<sup>23</sup> Gawande A. Slow Ideas. The New Yorker. 2013 Jul 29.

1  
2  
3 **Figure legends:**  
4  
5  
6  
7

8 **Figure 1: Baseline survey of Rwandan medical students.** (A) shows the percentage of students  
9 at UR reporting that they own a particular internet-capable device or use it in medical education.  
10 “Any device” refers to any of the following: tablet, smartphone, laptop, desktop. (B) shows the  
11 percentage of students indicating that they use a specific resource to study for coursework or  
12 prepare for examinations. n = 547 UR students and 157 MUHAS students.  
13  
14  
15  
16  
17  
18  
19  
20

21 **Figure 2: Predictor of UpToDate usage.** (A) shows the average daily usage (ADU) during the  
22 study period by UR students broken down by class year at enrollment. Students who did not log  
23 onto their accounts after enrolling into the study were assigned a daily topic viewing frequency  
24 of zero. n = 547 UR students.  
25  
26  
27  
28  
29  
30  
31  
32

33 **Figure 3: Changes in the usage of electronic resources.** Figures show the percentage of  
34 respondents who reported using a particular resource “almost every day” at enrollment and one  
35 year later at the time of annual evaluation. Shading added to highlight responses for UpToDate.  
36 (A) shows responses of UR users who had graduated at the time of annual evaluation and were  
37 practicing physicians. (B) shows responses of UR clinical students (Doc1 at time of enrollment)  
38 who were still in school at the time of annual evaluation. n = 62 UR graduates, and 66 UR  
39 students.  
40  
41  
42  
43  
44  
45  
46  
47  
48  
49  
50

51 **Figure 4: Impact of EBCR provision on class exam performance at UR.** (A) shows the  
52 average grades of graduating Doc4 students over time. Each dot represents one student and  
53  
54  
55  
56  
57  
58  
59  
60

1  
2  
3 shows the average of their grades in the following eight exams: written & clinical exams in  
4 internal medicine, pediatrics, obstetrics & gynecology, and surgery. (B) shows the average  
5 grades of students pre-UpToDate (2012-2015) and post-UpToDate (2016-2017). The p-value  
6 represents a two-sided heteroscedastic t-test. The error bars represent standard error of the mean.  
7  
8  
9  
10  
11  
12  
13

14 **Figure 5: EBCR utilization over time by UR students and faculty.** Lines show the average  
15 number of topics viewed per user per month by each user group. Only users who enrolled before  
16 03/01/16 are included in this analysis (n = 185 faculty, 70 Doc4 students). Call-outs are added to  
17 describe events in the careers of Doc4 students  
18  
19  
20  
21  
22  
23  
24  
25  
26  
27  
28  
29  
30  
31  
32  
33  
34  
35  
36  
37  
38  
39  
40  
41  
42  
43  
44  
45  
46  
47  
48  
49  
50  
51  
52  
53  
54  
55  
56  
57  
58  
59  
60

**Table 1**

|                         | <i>Coefficients</i> | <i>P-value</i>    |
|-------------------------|---------------------|-------------------|
| Cohort                  | -0.04               | 0.21              |
| Year at enrollment      | 0.12                | <b>&lt; 0.001</b> |
| Own any device          | 0.07                | 0.29              |
| Own smartphone          | -0.03               | 0.49              |
| Hours devoted to school | 0.00                | 0.91              |
| Google use frequency    | -0.02               | 0.30              |
| UpToDate use frequency  | 0.00                | 0.70              |

**Table 1: Multivariate linear regression with UpToDate usage as the dependent variable.**

The table shows a multivariable linear regression with average daily topic viewing frequency (natural logarithm transform) as the dependent variable. The dependent variable was calculated as “number of UpToDate topics viewed” / “days with an active subscription” for each user. It was set to zero for users who did not log on to UpToDate. The dependent variable was transformed with the equation  $Y' = \ln(Y+1)$  to approximate normality. The independent variables were set as follows: “Cohort” was set to 1 for students enrolling in 2015-2016 and 2 for student enrolling in 2016-2017. “Year at enrollment”: PCL1 was set to 1, PLC2 was set to 2, Doc1 was set to 3, Doc3 was set to 5 and Doc4 was set to 6. “Own any device” and “Own smartphone” were set to 0 if the student did not report ownership and to 1 if they did. “Hours devoted to school” is a sum of student reported hours spent in the classroom, in clinical activities, and on studying. “Google use frequency” and “UpToDate use frequency” were set based on student responses at the time of enrollment (before UpToDate subscriptions were given to them). They were set to 4 if student replied “almost every day”, 3 if “a few times per week”, 2 if “a few times per month”, 1 if “a few times per year” and 0 if “Never” or “I don’t know this resource.” P-value bolded if  $< 0.05$ .

**Table 2**

| Independent variable          | Partial SS | P-value            |
|-------------------------------|------------|--------------------|
| UpToDate offered <sup>b</sup> | 4197       | < 10 <sup>-4</sup> |
| Year of exam                  | 6196       | < 10 <sup>-4</sup> |

**Table 2: Two-way ANOVA with average Doc4 grade as dependent variable.** The table shows a two way ANOVA test with average Doc4 grade as dependent variable and year of exam and UpToDate provision as independent variables. n = 599 Doc4 students over 6 years.

<sup>b</sup> UpToDate offered was set to 0 for 2012-2015 and 1 for 2016-2017.



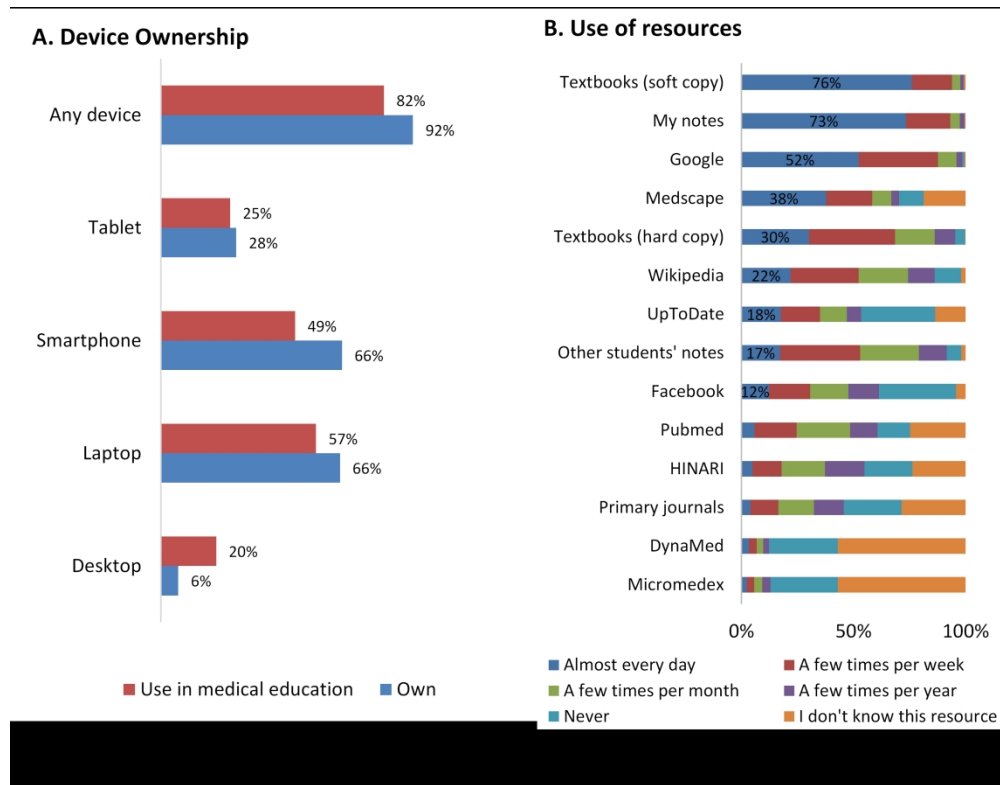

32 Figure 1: Baseline survey of Rwandan medical students. (A) shows the percentage of students at UR  
 33 reporting that they own a particular internet-capable device or use it in medical education. "Any device"  
 34 refers to any of the following: tablet, smartphone, laptop, desktop. (B) shows the percentage of students  
 35 indicating that they use a specific resource to study for coursework or prepare for examinations. n = 547 UR  
 36 students and 157 MUHAS students.  
 37  
 38  
 39  
 40  
 41  
 42  
 43  
 44  
 45  
 46  
 47  
 48  
 49  
 50  
 51  
 52  
 53  
 54  
 55  
 56  
 57  
 58  
 59  
 60

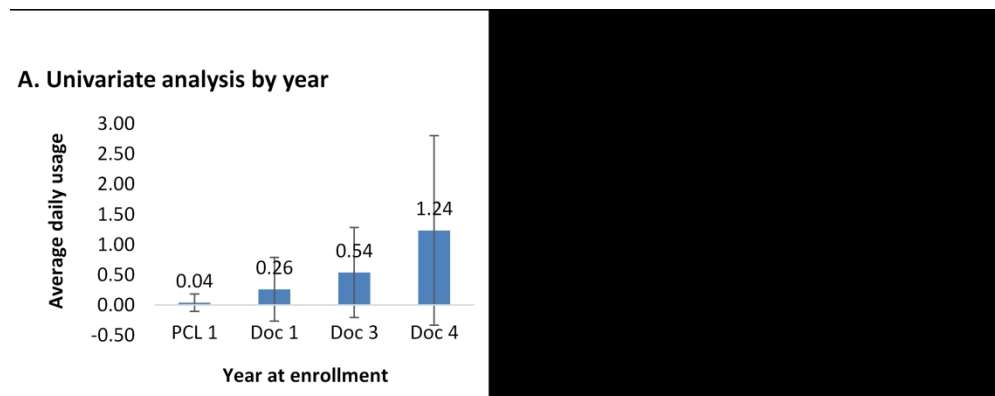

Figure 2: Predictor of UpToDate usage. (A) shows the average daily usage (ADU) during the study period by UR students broken down by class year at enrollment. Students who did not log onto their accounts after enrolling into the study were assigned a daily topic viewing frequency of zero. n = 547 UR students



Figure 3: Changes in the usage of electronic resources. Figures show the percentage of respondents who reported using a particular resource "almost every day" at enrollment and one year later at the time of annual evaluation. Shading added to highlight responses for UpToDate. (A) shows responses of UR users who had graduated at the time of annual evaluation and were practicing physicians. (B) shows responses of UR clinical students (Doc1 at time of enrollment) who were still in school at the time of annual evaluation. n = 62 UR graduates, and 66 UR students.

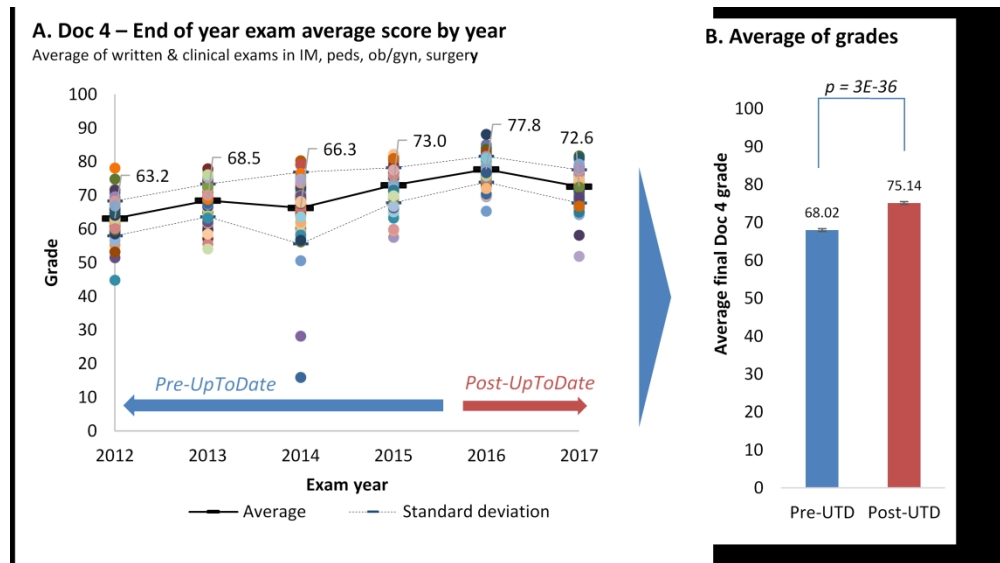

Figure 4: Impact of EBCR provision on class exam performance at UR. (A) shows the average grades of graduating Doc4 students over time. Each dot represents one student and shows the average of their grades in the following eight exams: written & clinical exams in internal medicine, pediatrics, obstetrics & gynecology, and surgery. (B) shows the average grades of students pre-UpToDate (2012-2015) and post-UpToDate (2016-2017). The p-value represents a two-sided heteroscedastic t-test. The error bars represent standard error of the mean.

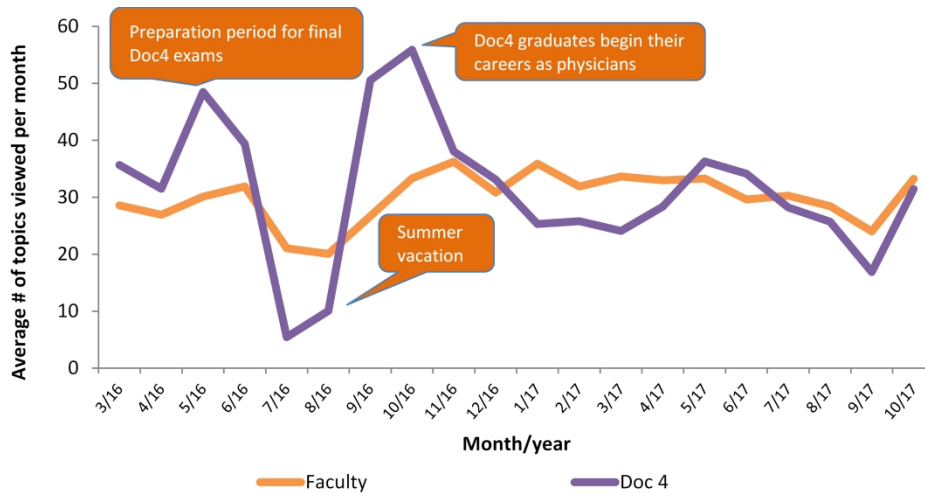

Figure 5: EBCR utilization over time by UR students and faculty. Lines show the average number of topics viewed per user per month by each user group. Only users who enrolled before 03/01/16 are included in this analysis (n = 185 faculty, 70 Doc4 students). Call-outs are added to describe events in the careers of Doc4 students

## Better evidence: A prospective cohort study assessing the utility of an Evidence-Based Clinical Resource at the University of Rwanda

### Supplementary Appendix

#### Supplementary Table 1: Participant enrolment

| Role           | Academic year                | Class at time of enrollment | Eligible    | Completing enrollment | % completing enrollment |
|----------------|------------------------------|-----------------------------|-------------|-----------------------|-------------------------|
| Students       | 2015-2016                    | PCL1 (1st year)             | 271         | 92                    | 34%                     |
|                |                              | Doc1 (3rd year)             | 125         | 90                    | 72%                     |
|                |                              | Doc4 (6th year)             | 86          | 84                    | 98%                     |
|                | 2016-2017                    | PCL1 (1st year)             | 102         | 24                    | 24%                     |
|                |                              | Doc1 (3rd year)             | 205         | 102                   | 50%                     |
|                |                              | Doc3 (5th year)             | 89          | 74                    | 83%                     |
|                |                              | Doc4 (6th year)             | 102         | 81                    | 79%                     |
|                | <b>Total - students</b>      |                             |             | <b>980</b>            | <b>547</b>              |
| <b>Faculty</b> | <b>Continuous enrollment</b> |                             | <b>1084</b> | <b>325</b>            | <b>29%</b>              |

**Supplementary Table 1: Participant enrolment.** Table shows the number of eligible students and faculty by role, academic year at time of enrollment, and class at time of enrollment. Table also shows the number of students and faculty who completed enrollment, and the percentage of eligible students who completed enrollment.

1 STROBE Statement—Checklist of items that should be included in reports of *cohort studies*

|                              | Item No | Recommendation                                                                                                                                                                                                                                                                                                                                                                                                                                                                                                                                          |
|------------------------------|---------|---------------------------------------------------------------------------------------------------------------------------------------------------------------------------------------------------------------------------------------------------------------------------------------------------------------------------------------------------------------------------------------------------------------------------------------------------------------------------------------------------------------------------------------------------------|
| <b>Title and abstract</b>    | 1       | (a) Indicate the study's design with a commonly used term in the title or the abstract<br><b>Study design indicated in the title</b><br>(b) Provide in the abstract an informative and balanced summary of what was done and what was found. <b>Page 2, abstract</b>                                                                                                                                                                                                                                                                                    |
| <b>Introduction</b>          |         |                                                                                                                                                                                                                                                                                                                                                                                                                                                                                                                                                         |
| Background/rationale         | 2       | Explain the scientific background and rationale for the investigation being reported<br><b>Page 3, introduction</b>                                                                                                                                                                                                                                                                                                                                                                                                                                     |
| Objectives                   | 3       | State specific objectives, including any prespecified hypotheses. <b>Page 6, last paragraph of "Introduction"</b>                                                                                                                                                                                                                                                                                                                                                                                                                                       |
| <b>Methods</b>               |         |                                                                                                                                                                                                                                                                                                                                                                                                                                                                                                                                                         |
| Study design                 | 4       | Present key elements of study design early in the paper. <b>Abstract</b>                                                                                                                                                                                                                                                                                                                                                                                                                                                                                |
| Setting                      | 5       | Describe the setting, locations, and relevant dates, including periods of recruitment, exposure, follow-up, and data collection. <b>Page 6, Methods ("Setting" and "Intervention")</b>                                                                                                                                                                                                                                                                                                                                                                  |
| Participants                 | 6       | (a) Give the eligibility criteria, and the sources and methods of selection of participants. Describe methods of follow-up. <b>Methods ("Intervention")</b><br>(b) For matched studies, give matching criteria and number of exposed and unexposed. <b>Not a matched study</b>                                                                                                                                                                                                                                                                          |
| Variables                    | 7       | Clearly define all outcomes, exposures, predictors, potential confounders, and effect modifiers. Give diagnostic criteria, if applicable. <b>Page 22, legend of Table 1</b>                                                                                                                                                                                                                                                                                                                                                                             |
| Data sources/<br>measurement | 8*      | For each variable of interest, give sources of data and details of methods of assessment (measurement). Describe comparability of assessment methods if there is more than one group. <b>Page 22, legend of Table 1</b>                                                                                                                                                                                                                                                                                                                                 |
| Bias                         | 9       | Describe any efforts to address potential sources of bias, <b>Page 8 "Data analysis"</b>                                                                                                                                                                                                                                                                                                                                                                                                                                                                |
| Study size                   | 10      | Explain how the study size was arrived at. <b>Study size was determined based on number of students enrolled at UR</b>                                                                                                                                                                                                                                                                                                                                                                                                                                  |
| Quantitative variables       | 11      | Explain how quantitative variables were handled in the analyses. If applicable, describe which groupings were chosen and why <b>Not applicable</b>                                                                                                                                                                                                                                                                                                                                                                                                      |
| Statistical methods          | 12      | (a) Describe all statistical methods, including those used to control for confounding. <b>Page 8 "Data analysis"</b><br>(b) Describe any methods used to examine subgroups and interactions. <b>Not applicable</b><br>(c) Explain how missing data were addressed. <b>Not applicable. No statistical inference was performed for students who did not complete the 1-year follow up survey</b><br>(d) If applicable, explain how loss to follow-up was addressed. <b>Not applicable</b><br>(e) Describe any sensitivity analyses. <b>Not applicable</b> |
| <b>Results</b>               |         |                                                                                                                                                                                                                                                                                                                                                                                                                                                                                                                                                         |
| Participants                 | 13*     | (a) Report numbers of individuals at each stage of study—eg numbers potentially eligible, examined for eligibility, confirmed eligible, included in the study, completing follow-up, and analysed. <b>Supplementary Table 1</b><br>(b) Give reasons for non-participation at each stage. <b>Students were invited to participate and voluntarily opted in. Reasons for non-participation were not documented.</b><br>(c) Consider use of a flow diagram. <b>Not applicable</b>                                                                          |

|                                                    |                          |     |                                                                                                                                                                                                                                                                                                                                                                                                                                                                                                         |
|----------------------------------------------------|--------------------------|-----|---------------------------------------------------------------------------------------------------------------------------------------------------------------------------------------------------------------------------------------------------------------------------------------------------------------------------------------------------------------------------------------------------------------------------------------------------------------------------------------------------------|
| 1<br>2<br>3<br>4<br>5<br>6<br>7<br>8<br>9          | Descriptive data         | 14* | (a) Give characteristics of study participants (eg demographic, clinical, social) and information on exposures and potential confounders. <b>Page 6, Methods (“Setting” and “Intervention”)</b><br><hr/> (b) Indicate number of participants with missing data for each variable of interest. <b>Page 9, results</b><br><hr/> (c) Summarise follow-up time (eg, average and total amount). <b>Page 6, Methods (“Setting” and “Intervention”)</b>                                                        |
| 10<br>11                                           | Outcome data             | 15* | Report numbers of outcome events or summary measures over time. <b>Page 10, “Results”</b>                                                                                                                                                                                                                                                                                                                                                                                                               |
| 12<br>13<br>14<br>15<br>16<br>17<br>18<br>19<br>20 | Main results             | 16  | (a) Give unadjusted estimates and, if applicable, confounder-adjusted estimates and their precision (eg, 95% confidence interval). Make clear which confounders were adjusted for and why they were included. <b>Page 22, Table 1 legend</b><br><hr/> (b) Report category boundaries when continuous variables were categorized. <b>Not applicable</b><br><hr/> (c) If relevant, consider translating estimates of relative risk into absolute risk for a meaningful time period. <b>Not applicable</b> |
| 21<br>22<br>23                                     | Other analyses           | 17  | Report other analyses done—eg analyses of subgroups and interactions, and sensitivity analyses <b>Page 7, Methods (“Data analysis”)</b>                                                                                                                                                                                                                                                                                                                                                                 |
| 24                                                 | <b>Discussion</b>        |     |                                                                                                                                                                                                                                                                                                                                                                                                                                                                                                         |
| 25                                                 | Key results              | 18  | Summarise key results with reference to study objectives. <b>Page 10, “Discussion”</b>                                                                                                                                                                                                                                                                                                                                                                                                                  |
| 26<br>27<br>28<br>29                               | Limitations              | 19  | Discuss limitations of the study, taking into account sources of potential bias or imprecision. Discuss both direction and magnitude of any potential bias. <b>Page 11, “Limitations”</b>                                                                                                                                                                                                                                                                                                               |
| 30<br>31<br>32<br>33                               | Interpretation           | 20  | Give a cautious overall interpretation of results considering objectives, limitations, multiplicity of analyses, results from similar studies, and other relevant evidence. <b>Page 10, “Discussion”</b>                                                                                                                                                                                                                                                                                                |
| 34<br>35<br>36                                     | Generalisability         | 21  | Discuss the generalisability (external validity) of the study results. <b>Page 12, “Next steps”</b>                                                                                                                                                                                                                                                                                                                                                                                                     |
| 37                                                 | <b>Other information</b> |     |                                                                                                                                                                                                                                                                                                                                                                                                                                                                                                         |
| 38<br>39<br>40<br>41                               | Funding                  | 22  | Give the source of funding and the role of the funders for the present study and, if applicable, for the original study on which the present article is based. <b>Page 13, “Funding”</b>                                                                                                                                                                                                                                                                                                                |

\*Give information separately for exposed and unexposed groups.

**Note:** An Explanation and Elaboration article discusses each checklist item and gives methodological background and published examples of transparent reporting. The STROBE checklist is best used in conjunction with this article (freely available on the Web sites of PLoS Medicine at <http://www.plosmedicine.org/>, Annals of Internal Medicine at <http://www.annals.org/>, and Epidemiology at <http://www.epidem.com/>). Information on the STROBE Initiative is available at <http://www.strobe-statement.org>.



# BMJ Open

## Better evidence: A Prospective Cohort Study Assessing the utility of an Evidence-Based Clinical Resource at the University of Rwanda

|                                 |                                                                                                                                                                                                                                                                                                                                                                                                                                                                                                                                                                                                                                                                                                                                                                                                                                                                                                                                                                                                                                                             |
|---------------------------------|-------------------------------------------------------------------------------------------------------------------------------------------------------------------------------------------------------------------------------------------------------------------------------------------------------------------------------------------------------------------------------------------------------------------------------------------------------------------------------------------------------------------------------------------------------------------------------------------------------------------------------------------------------------------------------------------------------------------------------------------------------------------------------------------------------------------------------------------------------------------------------------------------------------------------------------------------------------------------------------------------------------------------------------------------------------|
| Journal:                        | <i>BMJ Open</i>                                                                                                                                                                                                                                                                                                                                                                                                                                                                                                                                                                                                                                                                                                                                                                                                                                                                                                                                                                                                                                             |
| Manuscript ID                   | bmjopen-2018-026947.R2                                                                                                                                                                                                                                                                                                                                                                                                                                                                                                                                                                                                                                                                                                                                                                                                                                                                                                                                                                                                                                      |
| Article Type:                   | Research                                                                                                                                                                                                                                                                                                                                                                                                                                                                                                                                                                                                                                                                                                                                                                                                                                                                                                                                                                                                                                                    |
| Date Submitted by the Author:   | 31-May-2019                                                                                                                                                                                                                                                                                                                                                                                                                                                                                                                                                                                                                                                                                                                                                                                                                                                                                                                                                                                                                                                 |
| Complete List of Authors:       | <p>Valtis, Yannis; Brigham and Women's Hospital Department of Medicine; Global Health Delivery Project at Harvard University<br/> Rosenberg, Julie; Global Health Delivery Project at Harvard University<br/> Wachter, Keri; Global Health Delivery Project at Harvard University; Harvard Medical School<br/> Kisenge, Rodrick; Muhimbili University of Health and Allied Sciences<br/> Mashili, Fredrick; Muhimbili University of Health and Allied Sciences<br/> Chande Mallya, Rehema; Muhimbili University of Health and Allied Sciences<br/> Walker, Timothy; University of Rwanda College of Medicine and Health Sciences<br/> Kabakambira, J. Damascene; NIDDK, Section on Ethnicity &amp; Health; University of Rwanda College of Medicine and Health Sciences<br/> Egide, Abahuje; University of Rwanda College of Medicine and Health Sciences<br/> Ntacyabukura, Blaise; University of Rwanda College of Medicine and Health Sciences<br/> Weintraub, Rebecca; Harvard Medical School; Global Health Delivery Project at Harvard University</p> |
| <b>Primary Subject Heading</b>: | Global health                                                                                                                                                                                                                                                                                                                                                                                                                                                                                                                                                                                                                                                                                                                                                                                                                                                                                                                                                                                                                                               |
| Secondary Subject Heading:      | Evidence based practice, Medical education and training                                                                                                                                                                                                                                                                                                                                                                                                                                                                                                                                                                                                                                                                                                                                                                                                                                                                                                                                                                                                     |
| Keywords:                       | MEDICAL EDUCATION & TRAINING, Information technology < BIOTECHNOLOGY & BIOINFORMATICS, GENERAL MEDICINE (see Internal Medicine), EBCR, global medical education                                                                                                                                                                                                                                                                                                                                                                                                                                                                                                                                                                                                                                                                                                                                                                                                                                                                                             |
|                                 |                                                                                                                                                                                                                                                                                                                                                                                                                                                                                                                                                                                                                                                                                                                                                                                                                                                                                                                                                                                                                                                             |

SCHOLARONE™  
Manuscripts

## Better evidence: A Prospective Cohort Study Assessing the utility of an Evidence-Based Clinical Resource at the University of Rwanda

Article

### Authors:

Yannis K. Valtis, MD <sup>1,2,3</sup>; Julie Rosenberg, MPH <sup>1,3</sup>; Keri Wachter, MPH <sup>1,4</sup>; Rodrick Kisenge, MD <sup>5</sup>; Fredirick Mashili, MD <sup>5</sup>; Rehema Chande-Mallya, PhD <sup>5</sup>; Tim Walker, MD <sup>6,7</sup>; Jean Damascene Kabakambira, MD <sup>7,8</sup>; Abahuje Egide, MD <sup>7</sup>; Blaise Ntacyabukura <sup>7</sup>, Rebecca L. Weintraub, MD <sup>1,2,3</sup>.

1. Global Health Delivery Project at Harvard University, Boston, MA.
2. Harvard Medical School, Boston, MA.
3. Brigham and Women's Hospital, Boston, MA.
4. Harvard T.H. Chan School of Public Health, Boston, MA.
5. Muhimbili University of Health and Allied Sciences, Dar es Salaam, Tanzania.
6. Calvary Mater Hospital, Newcastle, Australia.
7. University of Rwanda, Kigali, Rwanda.
8. National Institutes of Health, Bethesda, MD.

### Contact Information:

Correspondence should be addressed to Rebecca Weintraub, Brigham and Women's Hospital, Global Health Delivery Project, 75 Francis St, Boston, MA 02115; e-mail: [rebecca@globalhealthdelivery.org](mailto:rebecca@globalhealthdelivery.org).

## Abstract

**Objective:** Evidence-based clinical resources (EBCRs) have the potential to improve diagnostic and therapeutic accuracy. The majority of U.S. teaching medical institutions have incorporated them into clinical training. Many EBCRs are subscription-based, and their cost is prohibitive for most clinicians and trainees in low- and middle-income countries. We sought to determine the utility of EBCRs in an East African medical school.

**Setting:** The University of Rwanda (UR), a medical school located in East Africa.

**Participants:** Medical students and faculty members at UR.

**Interventions:** We offered medical students and faculty at UR free access to UpToDate, a leading EBCR and conducted a cohort study to assess its uptake and usage. Students completed two surveys on their study habits and gave us permission to access their activity on UpToDate and their grades.

**Results:** Of the 980 medical students invited to enroll over two years, 547 did (56%). Of eligible final-year students, 88% enrolled. At baseline, 92% of students reported ownership of an internet-capable device, and the majority indicated using free online resources frequently for medical education. Enrolled final-year students viewed, on average, 1.24 topics per day and continued to use UpToDate frequently after graduation from medical school. Graduating class exam performance was better after introduction of UpToDate than in previous years.

**Conclusions:** Removal of the cost barrier was sufficient to generate high uptake of a leading EBCR by senior medical students and habituate them to continued usage after graduation.

### Strengths and limitations of this study

- This is the first reported longitudinal prospective cohort study of health professionals and trainees in Africa.
- This is the first study to link usage of online educational resources to performance in medical school examinations in Africa.
- Our ability to precisely track online usage of UpToDate eliminates recall bias that is likely to significantly impact findings of studies of educational interventions that are based on self-reporting.
- Given the observational nature of our study, we cannot make causal claims on the relationship between student use of UpToDate and their performance on medical school examinations.
- The relatively short follow-up period discussed in this paper limits our ability to understand the long term impact of offering UpToDate access to African health trainees.

## Introduction

The velocity of growth of the clinical evidence base is staggering: In the last three years alone, over 16,000 unique clinical studies posted new results on ClinicalTrials.gov.<sup>1</sup> There is more information emerging every year than any one person could ever retain. In response, educators in the United States (U.S.) have called for a shift in the basic paradigm of medical education, de-emphasizing the passive presentation of material and promoting problem-solving skills and the ability to find information and adapt it to the clinical situation at hand.<sup>2</sup> The Liaison Committee on Medical Education (LCME) mandates that self-directed learning be part of every accredited school's curriculum, and the American Board of Internal Medicine recently announced that maintenance of certification exams for internists and nephrologists will be open-book.<sup>3,4</sup> The historical focus on memorization is giving way to an emphasis on knowing how to find information, synthesize it, and apply it clinically. Clinicians who have not developed these skills during medical school or clinical training are at a disadvantage, which, ultimately, means their patients are at a disadvantage.<sup>5, 6, 7</sup>

The ability to access and synthesize clinical information effectively and efficiently is particularly crucial for clinicians in low- and middle-income countries (LMICs). The health workforce shortage and absence of specialists forces clinicians to care for more patients with a broader range of complaints than their counterparts in high-income countries. Rwanda, a country of 11 million people, had, until recently, a total of 15 anesthesiologists, 25 obstetricians, and zero neurologists.<sup>8,9</sup> In addition, a study of 21 hospitals in LMICs documented substantial knowledge gaps among physicians.<sup>10</sup> Constraints in medical education in these countries are likely responsible for both workforce and knowledge gaps. In 2011, the Sub-Saharan African Medical

1  
2  
3 School Study group surveyed 146 of 168 medical schools in the region and found widespread  
4 shortages in qualified faculty and infrastructure.<sup>11</sup>  
5  
6

7 To address the challenge of the rapidly expanding evidence base in medicine, several  
8 organizations in high-income countries have created evidence-based clinical resources (EBCRs)  
9 – regularly updated, expert-authored, online tools that synthesize the primary literature to guide  
10 clinical decision making. Over the years, UpToDate, which was founded at Harvard Medical  
11 School in 1992, has emerged as a leading EBCR in high-income countries, and several studies  
12 have documented its utility: Use of UpToDate has been associated with improved examination  
13 performance among internal medicine residents, as well as lower mortality at U.S. hospitals.<sup>5-6</sup>  
14  
15 As of February 2018, 90% of teaching U.S. medical institutions and 100% of the top 20 U.S.  
16 medical schools (as ranked by U.S. News & World Report) subscribed to UpToDate.<sup>12,13,14</sup>  
17  
18

19 Despite the high demand for UpToDate in U.S. medical education, none of the 168 medical  
20 schools in sub-Saharan Africa subscribe to its services, partly because of the high subscription  
21 cost. An individual physician subscription to UpToDate in Rwanda costs \$299 per year; Rwanda  
22 spent \$52 per capita on healthcare in 2014.<sup>15</sup> Additionally, cost of internet access can be  
23 prohibitively high in some LMICs; at the time of publication, mobile internet in Rwanda cost  
24 approximately \$0.05 per megabyte.<sup>16</sup>  
25  
26

27 Given their utility in high-income countries, access to EBCRs could help address some of the  
28 challenges faced by clinicians in LMICs. We believe that access to better evidence could  
29 improve the knowledge base of these clinicians, increase their perception of self-efficacy, and  
30 create a professional habit of seeking evidence at the point of care. This could be particularly  
31 beneficial for clinicians caring for a large number of complex patients without access to  
32 specialists. We have previously reported on a program which provides donated UpToDate  
33  
34  
35  
36  
37  
38  
39  
40  
41  
42  
43  
44  
45  
46  
47  
48  
49  
50  
51  
52  
53  
54  
55  
56  
57  
58  
59  
60

1  
2  
3 subscriptions to clinicians in LMICs, in which we found that most use UpToDate with high  
4 frequency and many report changing their clinical decision making as a result of having access to  
5 UpToDate.<sup>17</sup>  
6  
7

8  
9  
10 While EBCRs have traditionally been developed for physicians in practice, there are reasons to  
11 believe that their introduction to medical students would be beneficial. First, medical school is *de*  
12 *facto* the first locus of professional habit formation, and often their last formal one, as many  
13 clinicians in LMICs do not receive post-graduate education. Additionally, providing access to  
14 EBCRs to medical students in LMICs is a matter of equity: students who have worked hard to  
15 care for their community in LMICs should have the same opportunity to learn and provide  
16 quality care as their counterparts in U.S. medical schools. In this article, we hypothesized that  
17 removing the cost barrier to accessing EBCR will lead to high student uptake and possibly lead  
18 to an improvement in educational outcomes.  
19  
20  
21  
22  
23  
24  
25  
26  
27  
28  
29  
30  
31  
32

## 33 **Methods**

### 34 Setting

35  
36  
37 The University of Rwanda (UR) was the only medical degree-granting school in Rwanda at the  
38 time this study launched and is a public university. 76% of students at UR are recipients of  
39 bursaries from the Government of Rwanda.<sup>18</sup> Medical students enter UR after successful  
40 completion of high school and, during the study period, completed a 6-year medical education  
41 curriculum consisting of two years of pre-clinical education followed by 4 years of clinical  
42 education in the wards.  
43  
44  
45  
46  
47  
48  
49  
50

### 51 Intervention

1  
2  
3 In the fall of 2014, the authors formed an agreement with Wolters Kluwer, the parent company  
4 of UpToDate, to facilitate the donations of UpToDate subscriptions to medical students in sub-  
5  
6 Saharan Africa. With appropriate IRB approval, medical students and faculty at the University of  
7  
8 Rwanda were invited by email to enroll in our study. “Faculty member” was defined as anyone  
9  
10 who teaches undergraduate medical students, which meant that residents, as well as staff  
11  
12 physicians, were considered faculty. Undergraduate medical students, who unlike U.S. medical  
13  
14 students are admitted to medical school after high school at age 18, were invited to enroll as  
15  
16 well. Students were invited in cohorts that spanned the different years of medical school (see  
17  
18 Supplementary Table 1). Enrollment was voluntary and not mandated by faculty or the  
19  
20 curriculum. Each participant received a free 5-year individual subscription to UpToDate, which  
21  
22 allowed them to access the website from any computer or mobile device. The authors undertook  
23  
24 no recruitment or training efforts. Data reported in this paper was generated in 2015–2017. All  
25  
26 study subjects will be eligible for getting free UpToDate access after the 5 years of the study  
27  
28 through a donation program that UpToDate has created for all medical doctors practicing in  
29  
30 resource limited settings. This donation program is available to any medical provider in a low  
31  
32 and middle income country and gives free, unlimited access to UpToDate without a time limit.  
33  
34 Donations have to be renewed annually. Hence, all study subjects will be able to get free  
35  
36 UpToDate access after this study concludes, for as long as they practice medicine in a resource  
37  
38 limited setting. The donation program details can be found here:

39  
40  
41  
42  
43  
44  
45 <https://www.globalhealthdelivery.org/uptodate/apply>.

#### 46 47 48 49 Evaluation

50  
51 Students were asked to complete an online baseline survey to document their study habits before  
52  
53 provision of UpToDate and an Annual Evaluation survey. We chose questions around students’  
54  
55  
56  
57  
58  
59  
60



1  
2  
3 baseline utilization of the Internet in medical education, as others have identified access to  
4 devices and the Internet as potential barriers to EBCR utilization.<sup>19</sup> Students' responses over time  
5 were linked using their name and email. All participant activity on the UpToDate website and  
6 mobile application was tracked remotely and linked to survey responses. An anonymized dataset  
7 of all student grades for the graduating classes of 2012-2017 was obtained to assess the impact of  
8 UpToDate on class examination performance. Lastly, to understand student usage of UpToDate  
9 over time, we plotted the average number of topics viewed per month by active users. To  
10 characterize a stable cohort of users over time, we plotted the average number of topics viewed  
11 by students in their final year who enrolled before March 1<sup>st</sup> 2016.  
12  
13  
14  
15  
16  
17  
18  
19  
20  
21  
22

### 23 Data analysis

24  
25  
26 To understand EBCR usage patterns by students and faculty, we calculated for each user  
27 the number of topics viewed. Any action resulting in the opening of a new UpToDate card (with  
28 a distinct title) was counted as a new topic. Viewing of the same topic in the same session was  
29 counted only once. A session was defined as the time period using UpToDate, initiated by a  
30 unique log-on of a user to the UpToDate website, mobile site, or mobile application and  
31 terminated when the user logged off, closed the application, or remained inactive for more than  
32 three hours. To calculate the average daily usage (ADU), the number of topics viewed was  
33 divided by the number of days that the user had an active account. The number of days with an  
34 active account was defined as the interval between the users' first-ever log-on and the end of the  
35 study period (10/31/2017). To identify predictors of high usage frequency, we conducted a  
36 multivariable linear regression after applying the natural log transform to ADU values to  
37 approximate normality.  
38  
39  
40  
41  
42  
43  
44  
45  
46  
47  
48  
49  
50  
51  
52  
53  
54  
55  
56  
57  
58  
59  
60

To understand the impact of UpToDate on the overall exam performance of the graduating class at UR, we calculated the average grade of each graduating student for 2012-2017 by averaging their performance in all of their graduation exams. These were written and clinical exams in the following subjects: internal medicine, surgery, obstetrics & gynecology, and pediatrics. To assess the impact of UpToDate, we performed two tests: First, we performed a two-sided heteroscedastic t-test between grades assigned before UpToDate provision (2012-2015) and grades assigned after (2016-2017). To control for variability due to the year of exam administration, we performed a two-way Analysis of Variance (ANOVA) test with year of exam and UpToDate provision as the independent variables and average exam grade as the dependent variable.

Data analysis was performed on Stata SE 14 and Microsoft Excel.

#### Patient and public involvement

Patients were not the subject of this study. Given the setting of the study at a medical school, it was not feasible to include a patient partner. A medical student at UR (BN) is a co-author of this study and brought the student perspective into the interpretation of the data.

#### **Results**

Of the 980 students and 1,084 faculty invited to enroll into the study during the 2015-2017 study period, 547 (56%) students and 325 (29%) faculty did. The highest enrollment rate (87%) was observed among students in their final (sixth) year of medical school, who are called “Doctorate 4” or Doc4 students at UR (Supplementary Table 1). In our baseline survey, 92% of student respondents overall and 96% of Doc4 students reported ownership of at least one internet-capable device (Figure 1a). Free electronic resources—primarily Medscape, Google, and

1  
2  
3 Wikipedia—were used frequently for the purposes of medical education (Figure 1b). A small  
4  
5 percentage reported frequent usage of UpToDate at baseline.  
6

7  
8 All users who completed the enrollment survey had an individual UpToDate account created for  
9  
10 them and received an email with instructions on how to set up their UpToDate password. Of  
11  
12 those who activated their UpToDate account, 76% of faculty and 64% of students viewed, on  
13  
14 average, at least one UpToDate topic per week; 13% of faculty and 23% of students viewed, on  
15  
16 average, one topic or more per day. In a multivariate linear regression looking at variables  
17  
18 associated with UpToDate usage frequency, student year at enrollment was the only significantly  
19  
20 associated variable (Table 1) . Figure 2 shows average UpToDate usage by year of student at  
21  
22 enrollment.  
23  
24

25  
26 One year after enrollment, 52% of students completed the annual evaluation; 74% of Doc4  
27  
28 students did so. The low response rates could be attributed to lack of positive incentives to  
29  
30 complete the survey or to students not checking their email to see that the evaluation survey was  
31  
32 due. Both graduates, who had enrolled into the study as Doc4 students, and continuing students  
33  
34 reported increased usage of UpToDate. Continuing students also reported decreased use of  
35  
36 Google and Wikipedia (Figure 3).  
37  
38

39  
40 To assess the effect of providing UpToDate to students on their educational performance, we  
41  
42 plotted the average grades of each graduating class from 2012 to 2017 (599 students in total) and  
43  
44 compared the pre-UpToDate period (2012-2015; average grade 68) to the post-UpToDate period  
45  
46 (2016-2017; average grade 75) (Figure 4). Both a simple t-test as well as a two-way ANOVA  
47  
48 showed a statistically significant difference (Table 2). In 2017, a student who scored 68 would  
49  
50 have ranked at the 16<sup>th</sup> percentile of the class, while a student scoring 75 would have ranked at  
51  
52 the 66<sup>th</sup> percentile.  
53  
54  
55  
56  
57  
58  
59  
60

1  
2  
3 We used remote tracking to assess Doc4 student usage over time and found that it spiked in May  
4  
5 2016, as students prepared for their graduation exams in June. Usage fell significantly during  
6  
7 summer vacation, but rose again in September and October, as the new graduates began their  
8  
9 careers as physicians, either in residency or in independent practice. A similar pattern of usage  
10  
11 over time was seen among faculty (Figure 5).  
12  
13  
14  
15

## 16 17 **Discussion**

18  
19 Our findings represent the first prospective cohort study of medical students in Africa and  
20  
21 suggest that access to devices and the internet might not be a significant barrier for African  
22  
23 medical students wishing to access online resources. Our findings align with observations from a  
24  
25 2016 study in Zimbabwe and contrast two earlier studies in Nigeria published in 2004 and 2008  
26  
27 that suggest lack of access to internet.<sup>20,21,22</sup> The differences might be related to the passage of  
28  
29 time or resource availability differences between Rwanda and Nigeria. The findings suggest that,  
30  
31 in Rwanda, our focus should not be on securing devices but on securing access to the latest  
32  
33 online tools and evidence.  
34  
35

36  
37 Our study also shows that students, especially final-year students, used a leading EBCR  
38  
39 frequently when the cost barrier was removed. This was achieved with no provision of internet-  
40  
41 capable devices, no subsidizing of mobile internet data, no dedicated training activities on EBCR  
42  
43 use or evidence searching, and no curricular integration of EBCRs. Overall, our findings suggest  
44  
45 that removing the cost barrier to access of EBCRs can generate uptake among a subset of  
46  
47 medical students in East Africa. The low uptake of UpToDate by pre-clinical UR students could  
48  
49 be related to the basic science focus of their curriculum, which makes UpToDate's clinical  
50  
51 content less relevant.  
52  
53  
54  
55  
56  
57  
58  
59  
60

1  
2  
3 The introduction of an EBCR during the last year of medical school may lead to habit formation.  
4  
5 Among students receiving an EBCR subscription in their final year, usage was sustained for the  
6  
7 one and a half year period monitored after graduation. Additionally, self-reported usage of non-  
8  
9 validated sources such as Google and Wikipedia fell among students within a year of UpToDate  
10  
11 provision. In 2013, Gawande argued that habit change and formation in healthcare is a complex  
12  
13 process that can often take decades.<sup>23</sup> He also argued that some habits form quickly and that  
14  
15 those might be the ones that make a physician's workflow faster and more efficient. Our study  
16  
17 suggests that UpToDate may fall into this category of tools and habits that facilitate faster, more  
18  
19 efficient work.  
20  
21  
22

23  
24 The temporal association of free access to UpToDate with an improvement of the overall  
25  
26 examination performance of the graduating class may be causal or due to another explanation, as  
27  
28 discussed below. It is consistent, however, with previous reports of associations between  
29  
30 UpToDate usage and performance in exams by residents in the U.S. and Japan, and practicing  
31  
32 physicians in the U.S.  
33  
34

### 35 Limitations

36  
37 Our study is subject to selection bias given its observational nature. It is possible that students  
38  
39 with regular access to email were more likely to respond to our email-based invitation, thus  
40  
41 biasing the response set, especially with respect to use of electronic resources and internet  
42  
43 access. The high enrollment rate among Doc4 students mitigates this effect to some extent.  
44  
45

46  
47 The use of a historical control to assess the impact of UpToDate's introduction on student grades  
48  
49 also has several limitations. First, no causal arguments can be made, given the fact that different  
50  
51 exams were used each year and different students took them. While UpToDate may have helped  
52  
53 students prepare for their exams more efficiently and increase their knowledge base, it is also  
54  
55  
56  
57  
58  
59  
60

1  
2  
3 possible that the exams in 2016 and 2017 were easier than those of years past or that the students  
4 were independently academically superior to the previous classes. The cause of the overall  
5 increase in student scores before UpToDate was introduced is unclear and could be related to  
6 changes in educational methods or examinations, although we do not have evidence for either of  
7 those. In addition, the reason for the decline in of students' scores from 2016 to 2017 is  
8 unknown, and could be statistically random or indicative of a trend. Further follow up will be  
9 required to answer this question.

10  
11  
12  
13  
14  
15  
16  
17  
18  
19 Second, it is possible that test answers may not be contained/addressed in UpToDate, although  
20 the UR faculty among the authors of this paper do not believe that to be the case.

#### 21 22 23 24 Next steps

25  
26 Due to its longitudinal nature, this study has the potential to offer additional insights on the  
27 changes in learning behaviors of African health trainees over time. Qualitative research on this  
28 student cohort could help elucidate the drivers of different study behaviors, and the perceived  
29 impact of resources such as UpToDate on clinician's knowledge base and self-efficacy.

30  
31  
32  
33  
34  
35  
36  
37  
38  
39  
40  
41  
42  
43  
44  
45  
46  
47  
48  
49  
50  
51  
52  
53  
54  
55  
56  
57  
58  
59  
60  
Future research might explore other EBCRs and features that impact uptake and utility. We  
focused on UpToDate because of the body of literature that supports its value in high-income  
countries. However, we hypothesize that a suite of EBCRs and learning tools, possibly in  
multiple languages, might be helpful for trainees in LMICs. Given the relatively easy scalability  
of software-based tools, we believe that we can continue to decrease the barriers for trainees in  
LMICs to access the best available evidence at the frontline of care delivery. Our vision is that  
this work can prepare and inform how the next generation of clinicians in LMICs practices  
evidence-based medicine. Although our research focused on LMICs, disparities in access to  
high-quality EBCRs might exist within U.S. medical education as well, which can also be an

1  
2  
3 area of future research and programming. As medicine continues to evolve rapidly and medical  
4  
5 education shifts its focus from memorization to critical processing of information, we must  
6  
7 ensure that all learners have equitable access to the best information available.  
8  
9

10  
11  
12 **Acknowledgements:** The authors wish to thank Dr. Peter Bonis, Dr. Denise Basow, Denise  
13  
14 Gilpin, Dr. Ellie Baron, Becky Mueller, and Bin Cao at Wolters Kluwer for their generous  
15  
16 support of this work. They would also like to thank Marie Teichman, Teresa Oszkinis, Elissa  
17  
18 Dakers and Fatima Fairfax for logistical support of this study. Lastly, the authors wish to thank  
19  
20 Kate Miller and Dr. Shelley Hurwitz for statistical expertise and guidance.<sup>a</sup>  
21  
22  
23

24  
25  
26 **Funding:** Wolters Kluwer donated the free UpToDate subscriptions. Y.K. Valtis received  
27  
28 funding from the Alexander Onassis Foundation, the Harvard Medical School Abundance Fund,  
29  
30 and the Scholars In Medicine Office at Harvard Medical School. Global Health Delivery staff  
31  
32 were supported by the Abundance Fund. Wolters Kluwer did not provide any monetary support  
33  
34 to this study.  
35  
36  
37

38  
39  
40 **Competing interests:** None declared  
41  
42  
43  
44  
45  
46

47  
48 <sup>a</sup> This work was conducted with support from Harvard Catalyst, The Harvard Clinical and  
49  
50 Translational Science Center (National Center for Research Resources and the National Center  
51  
52 for Advancing Translational Sciences, National Institutes of Health Award UL1 TR001102), and  
53  
54 financial contributions from Harvard University and its affiliated academic healthcare centers.  
55  
56 The content is solely the responsibility of the authors and does not necessarily represent the  
57  
58 official views of Harvard Catalyst, Harvard University and its affiliated academic healthcare  
59  
60 centers, or the National Institutes of Health.

1  
2  
3 **Ethical Approval:** The research described here was approved by the Harvard Medical School  
4  
5 Longwood Medical Area Institutional Review Board and the College of Medicine and Health  
6  
7 Sciences University of Rwanda Institutional Review Board.  
8  
9

10  
11  
12 **Data sharing:** No data are available.  
13  
14

15  
16  
17 **Contributorship:** YV, JR, KW, RK, FM, RCM, TW, RW designed the study and co-wrote its  
18  
19 protocol. JDK, AE, BN implemented the study at the University of Rwanda. YV analyzed the  
20  
21 data and drafted this manuscript. All authors edited the manuscript. RW oversaw the entire  
22  
23 design, implementation, and analysis of the study.  
24  
25  
26  
27  
28  
29  
30  
31  
32  
33  
34  
35  
36  
37  
38  
39  
40  
41  
42  
43  
44  
45  
46  
47  
48  
49  
50  
51  
52  
53  
54  
55  
56  
57  
58  
59  
60



---

## References

- <sup>1</sup> ClinicalTrials.gov [Internet]. U.S. National Institutes of Health. Trends, Charts, and Maps; 2017 [cited 2018 Jan 12]. Available from:  
<https://clinicaltrials.gov/ct2/resources/trends#RegisteredStudiesOverTime>
- <sup>2</sup> Schwartzstein RM, Roberts DH. Saying Goodbye to Lectures in Medical School - Paradigm Shift or Passing Fad? *N Engl J Med*. 2017 Aug 17;377(7):605-607. doi: 10.1056/NEJMp1706474. PubMed PMID: 28813217.
- <sup>3</sup> Weinberger SE. Opening the Book on Maintenance of Certification. *Ann Intern Med*. 2017 Sep 5;167(5):353-354. doi: 10.7326/M17-1853. Epub 2017 Aug 15. PubMed PMID: 28806790.
- <sup>4</sup> LCME Website [Internet]. Liaison Committee on Medical Education. Functions and Structure of a Medical School; 2016 [cited 2018 Jan 12]. Available from: <http://lcme.org/publications/>
- <sup>5</sup> Mullan F, Frehywot S, Omaswa F, Buch E, Chen C, Greysen SR, Wassermann T, Abubakr DE, Awases M, Boelen C, Diomande MJ, Dovlo D, Ferro J, Haileamlak A, Iputo J, Jacobs M, Koumaré AK, Mipando M, Monekosso GL, Olapade-Olaopa EO, Rugarabamu P, Sewankambo NK, Ross H, Ayas H, Chale SB, Cyprien S, Cohen J, Haile-Mariam T, Hamburger E, Jolley L, Kolars JC, Kombe G, Neusy AJ. Medical schools in sub-Saharan Africa. *Lancet*. 2011 Mar 26;377(9771):1113-21. doi: 10.1016/S0140-6736(10)61961-7. Epub 2010 Nov 10. Erratum in: *Lancet*. 2011 Mar 26;377(9771):1076. PubMed PMID: 21074256.

1  
2  
3  
4  
5  
6  
7  
8  
9  
10  
11  
12  
13  
14  
15  
16  
17  
18  
19  
20  
21  
22  
23  
24  
25  
26  
27  
28  
29  
30  
31  
32  
33  
34  
35  
36  
37  
38  
39  
40  
41  
42  
43  
44  
45  
46  
47  
48  
49  
50  
51  
52  
53  
54  
55  
56  
57  
58  
59  
60

---

<sup>6</sup> McDonald FS, Zeger SL, Kolars JC. Factors associated with medical knowledge acquisition during internal medicine residency. *J Gen Intern Med.* 2007 Jul;22(7):962-8. Epub 2007 Apr 28. PubMed PMID: 17468889; PubMed Central PMCID: PMC2219722.

<sup>7</sup> Shimizu T, Nemoto T, Tokuda Y. Effectiveness of a clinical knowledge support system for reducing diagnostic errors in outpatient care in Japan: A retrospective study. *Int J Med Inform.* 2018 Jan;109:1-4. doi: 10.1016/j.ijmedinf.2017.09.010. Epub 2017 Sep 25. PubMed PMID: 29195700.

<sup>8</sup> Holmer H, Lantz A, Kunjumen T, Finlayson S, Hoyler M, Siyam A, Montenegro H, Kelley ET, Campbell J, Cherian MN, Hagander L. Global distribution of surgeons, anaesthesiologists, and obstetricians. *Lancet Glob Health.* 2015 Apr 27;3 Suppl 2:S9-11. doi: 10.1016/S2214-109X(14)70349-3. PubMed PMID: 25926323.

<sup>9</sup> Bower JH, Zenebe G. Neurologic services in the nations of Africa. *Neurology.* 2005 Feb 8;64(3):412-5. PubMed PMID: 15699367.

<sup>10</sup> Nolan T, Angos P, Cunha AJ, Muhe L, Qazi S, Simoes EA, Tamburlini G, Weber M, Pierce NF. Quality of hospital care for seriously ill children in less-developed countries. *Lancet.* 2001 Jan 13;357(9250):106-10. PubMed PMID: 11197397.

1  
2  
3  
4  
5  
6  
7  
8  
9  
10  
11  
12  
13  
14  
15  
16  
17  
18  
19  
20  
21  
22  
23  
24  
25  
26  
27  
28  
29  
30  
31  
32  
33  
34  
35  
36  
37  
38  
39  
40  
41  
42  
43  
44  
45  
46  
47  
48  
49  
50  
51  
52  
53  
54  
55  
56  
57  
58  
59  
60

---

<sup>11</sup> Mullan F, Frehywot S, Omaswa F, Buch E, Chen C, Greysen SR, Wassermann T, Abubakr DE, Awases M, Boelen C, Diomande MJ, Dovlo D, Ferro J, Haileamlak A, Iputo J, Jacobs M, Koumaré AK, Mipando M, Monekosso GL, Olapade-Olaopa EO, Rugarabamu P, Sewankambo NK, Ross H, Ayas H, Chale SB, Cyprien S, Cohen J, Haile-Mariam T, Hamburger E, Jolley L, Kolars JC, Kombe G, Neusy AJ. Medical schools in sub-Saharan Africa. *Lancet*. 2011 Mar 26;377(9771):1113-21. doi: 10.1016/S0140-6736(10)61961-7. Epub 2010 Nov 10. Erratum in: *Lancet*. 2011 Mar 26;377(9771):1076. PubMed PMID: 21074256.

<sup>12</sup> UpToDate website [Internet]. Wolters Kluwer. Editorial; 2017 [cited 2018 Jan 12]. Available from: <https://www.uptodate.com/home/editorial>

<sup>13</sup> US News & World Report Website [Internet]. US News & World. 2018 Best Medical Schools: Research; 2017 [cited 2018 Jan 12]. Available from: <https://www.usnews.com/best-graduate-schools/top-medical-schools/research-rankings?int=af3309&int=b3b50a&int=b14409>

<sup>14</sup> Personal Communication. Top 20 US Research Medical Schools, as ranked by US News & World Report in 2017 were contacted by email and asked whether they offer UpToDate access to their medical students.

<sup>15</sup> World Bank Website [Internet]. The World Bank. Health Expenditure per capita; 2017 [cited 2018 Jan 12]. Available from: <https://data.worldbank.org/indicator/SH.XPD.PCAP>

1  
2  
3  
4  
5  
6  
7  
8  
9  
10  
11  
12  
13  
14  
15  
16  
17  
18  
19  
20  
21  
22  
23  
24  
25  
26  
27  
28  
29  
30  
31  
32  
33  
34  
35  
36  
37  
38  
39  
40  
41  
42  
43  
44  
45  
46  
47  
48  
49  
50  
51  
52  
53  
54  
55  
56  
57  
58  
59  
60

---

<sup>16</sup> MTN Website [Internet]. MTN. MTN Mobile Internet; 2019 [cited 2019 Feb 19]. Available from: [http://www.mtn.co.rw/Content/Pages/79/MTN\\_Mobile\\_Internet](http://www.mtn.co.rw/Content/Pages/79/MTN_Mobile_Internet)

<sup>17</sup> Valtis YK, Rosenberg J, Bhandari S, Wachter K, Teichman M, Beauvais S, Weintraub R. Evidence-based medicine for all: what we can learn from a programme providing free access to an online clinical resource to health workers in resource-limited settings. *BMJ Glob Health*. 2016 May 23;1(1):e000041. doi: 10.1136/bmjgh-2016-000041. eCollection 2016. PubMed PMID: 28588926; PubMed Central PMCID: PMC5321332.

<sup>18</sup> UR Website [Internet]. University of Rwanda Planning M&E Unit. Facts and Figures; 2017 [cited 2018 Jan 12]. Available from: <http://ur.ac.rw/sites/default/files/Facts%20and%20Figures-2017-Final%20to%20be%20published.pdf#overlay-context=>

<sup>19</sup> Mazloomdoost D, Mehregan S, Mahmoudi H, Soltani A, Embi PJ. Perceived barriers to information access among medical residents in Iran: obstacles to answering clinical queries in settings with limited Internet accessibility. *AMIA Annu Symp Proc*. 2007 Oct 11:523-7. PubMed PMID: 18693891; PubMed Central PMCID: PMC2655820

<sup>20</sup> Bello IS, Arogundade FA, Sanusi AA, Ezeoma IT, Abioye-Kuteyi EA, Akinsola A. Knowledge and utilization of Information Technology among health care professionals and students in Ile-Ife, Nigeria: a case study of a university teaching hospital. *J Med Internet Res*. 2004 Dec 17;6(4):e45. PubMed PMID: 15631969; PubMed Central PMCID: PMC1550621.

1  
2  
3  
4  
5  
6  
7<sup>21</sup> Odusanya OO, Bamgbala OA. Computing and information technology skills of final year  
8  
9  
10  
11  
12  
13  
14  
15  
16  
17  
18  
19  
20  
21  
22  
23  
24  
25  
26  
27  
28  
29  
30  
31  
32  
33  
34  
35  
36  
37  
38  
39  
40  
41  
42  
43  
44  
45  
46  
47  
48  
49  
50  
51  
52  
53  
54  
55  
56  
57  
58  
59  
60

---

medical and dental students at the College of Medicine University of Lagos. Niger Postgrad  
Med J. 2002 Dec;9(4):189-93. PubMed PMID: 12690677.

<sup>22</sup> Parve S, Ershadi A, Karimov A, Dougherty A, Ndhlovu CE, Chidzonga MM, Sadigh M.  
Access, attitudes and training in information technologies and evidence-based medicine among  
medical students at University of Zimbabwe College of Health Sciences. Afr Health Sci. 2016  
Sep;16(3):860-865. PubMed PMID: 27917222; PubMed Central PMCID: PMC5111979.

<sup>23</sup> Gawande A. Slow Ideas. The New Yorker. 2013 Jul 29.

1  
2  
3 **Figure legends:**  
4  
5  
6  
7

8 **Figure 1: Baseline survey of Rwandan medical students.** (A) shows the percentage of students  
9 at UR reporting that they own a particular internet-capable device or use it in medical education.  
10 “Any device” refers to any of the following: tablet, smartphone, laptop, desktop. (B) shows the  
11 percentage of students indicating that they use a specific resource to study for coursework or  
12 prepare for examinations. n = 547 UR students and 157 MUHAS students.  
13  
14  
15  
16  
17  
18  
19  
20

21 **Figure 2: Predictor of UpToDate usage.** (A) shows the average daily usage (ADU) during the  
22 study period by UR students broken down by class year at enrollment. Students who did not log  
23 onto their accounts after enrolling into the study were assigned a daily topic viewing frequency  
24 of zero. n = 547 UR students.  
25  
26  
27  
28  
29  
30  
31  
32

33 **Figure 3: Changes in the usage of electronic resources.** Figures show the percentage of  
34 respondents who reported using a particular resource “almost every day” at enrollment and one  
35 year later at the time of annual evaluation. Shading added to highlight responses for UpToDate.  
36 (A) shows responses of UR users who had graduated at the time of annual evaluation and were  
37 practicing physicians. (B) shows responses of UR clinical students (Doc1 at time of enrollment)  
38 who were still in school at the time of annual evaluation. n = 62 UR graduates, and 66 UR  
39 students.  
40  
41  
42  
43  
44  
45  
46  
47  
48  
49  
50

51 **Figure 4: Impact of EBCR provision on class exam performance at UR.** (A) shows the  
52 average grades of graduating Doc4 students over time. Each dot represents one student and  
53  
54  
55  
56  
57  
58  
59  
60

1  
2  
3 shows the average of their grades in the following eight exams: written & clinical exams in  
4 internal medicine, pediatrics, obstetrics & gynecology, and surgery. (B) shows the average  
5 grades of students pre-UpToDate (2012-2015) and post-UpToDate (2016-2017). The p-value  
6 represents a two-sided heteroscedastic t-test. The error bars represent standard error of the mean.  
7  
8  
9  
10  
11  
12  
13

14 **Figure 5: EBCR utilization over time by UR students and faculty.** Lines show the average  
15 number of topics viewed per user per month by each user group. Only users who enrolled before  
16 03/01/16 are included in this analysis (n = 185 faculty, 70 Doc4 students). Call-outs are added to  
17 describe events in the careers of Doc4 students  
18  
19  
20  
21  
22  
23  
24  
25  
26  
27  
28  
29  
30  
31  
32  
33  
34  
35  
36  
37  
38  
39  
40  
41  
42  
43  
44  
45  
46  
47  
48  
49  
50  
51  
52  
53  
54  
55  
56  
57  
58  
59  
60

**Table 1**

|                         | <i>Coefficients</i> | <i>P-value</i>    |
|-------------------------|---------------------|-------------------|
| Cohort                  | -0.04               | 0.21              |
| Year at enrollment      | 0.12                | <b>&lt; 0.001</b> |
| Own any device          | 0.07                | 0.29              |
| Own smartphone          | -0.03               | 0.49              |
| Hours devoted to school | 0.00                | 0.91              |
| Google use frequency    | -0.02               | 0.30              |
| UpToDate use frequency  | 0.00                | 0.70              |

**Table 1: Multivariate linear regression with UpToDate usage as the dependent variable.**

The table shows a multivariable linear regression with average daily topic viewing frequency (natural logarithm transform) as the dependent variable. The dependent variable was calculated as “number of UpToDate topics viewed” / “days with an active subscription” for each user. It was set to zero for users who did not log on to UpToDate. The dependent variable was transformed with the equation  $Y' = \ln(Y+1)$  to approximate normality. The independent variables were set as follows: “Cohort” was set to 1 for students enrolling in 2015-2016 and 2 for student enrolling in 2016-2017. “Year at enrollment”: PCL1 was set to 1, PLC2 was set to 2, Doc1 was set to 3, Doc3 was set to 5 and Doc4 was set to 6. “Own any device” and “Own smartphone” were set to 0 if the student did not report ownership and to 1 if they did. “Hours devoted to school” is a sum of student reported hours spent in the classroom, in clinical activities, and on studying. “Google use frequency” and “UpToDate use frequency” were set based on student responses at the time of enrollment (before UpToDate subscriptions were given to them). They were set to 4 if student replied “almost every day”, 3 if “a few times per week”, 2 if “a few times per month”, 1 if “a few times per year” and 0 if “Never” or “I don’t know this resource.” P-value bolded if  $< 0.05$ .



**Table 2**

| Independent variable          | Partial SS | P-value            |
|-------------------------------|------------|--------------------|
| UpToDate offered <sup>b</sup> | 4197       | < 10 <sup>-4</sup> |
| Year of exam                  | 6196       | < 10 <sup>-4</sup> |

**Table 2: Two-way ANOVA with average Doc4 grade as dependent variable.** The table shows a two way ANOVA test with average Doc4 grade as dependent variable and year of exam and UpToDate provision as independent variables. n = 599 Doc4 students over 6 years.

<sup>b</sup> UpToDate offered was set to 0 for 2012-2015 and 1 for 2016-2017.



32 Figure 1: Baseline survey of Rwandan medical students. (A) shows the percentage of students at UR  
 33 reporting that they own a particular internet-capable device or use it in medical education. "Any device"  
 34 refers to any of the following: tablet, smartphone, laptop, desktop. (B) shows the percentage of students  
 35 indicating that they use a specific resource to study for coursework or prepare for examinations. n = 547 UR  
 36 students and 157 MUHAS students.  
 37  
 38  
 39  
 40  
 41  
 42  
 43  
 44  
 45  
 46  
 47  
 48  
 49  
 50  
 51  
 52  
 53  
 54  
 55  
 56  
 57  
 58  
 59  
 60



Figure 2: Predictor of UpToDate usage. (A) shows the average daily usage (ADU) during the study period by UR students broken down by class year at enrollment. Students who did not log onto their accounts after enrolling into the study were assigned a daily topic viewing frequency of zero. n = 547 UR students

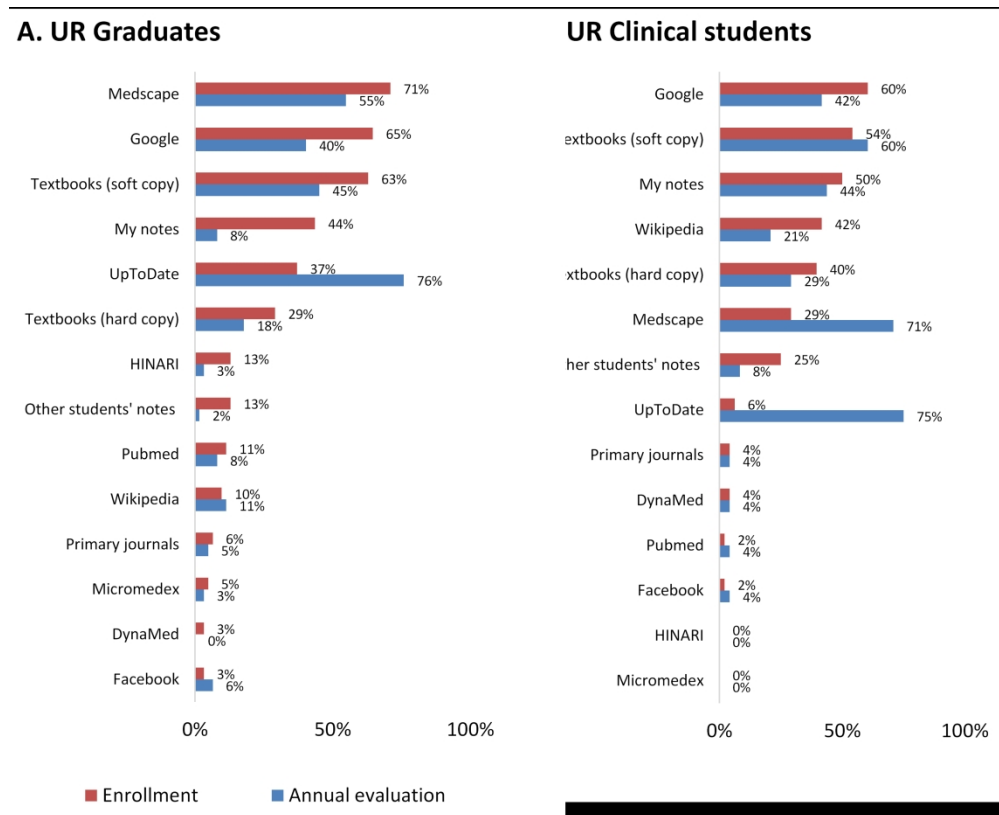

Figure 3: Changes in the usage of electronic resources. Figures show the percentage of respondents who reported using a particular resource "almost every day" at enrollment and one year later at the time of annual evaluation. Shading added to highlight responses for UpToDate. (A) shows responses of UR users who had graduated at the time of annual evaluation and were practicing physicians. (B) shows responses of UR clinical students (Doc1 at time of enrollment) who were still in school at the time of annual evaluation. n = 62 UR graduates, and 66 UR students.



Figure 4: Impact of EBCR provision on class exam performance at UR. (A) shows the average grades of graduating Doc4 students over time. Each dot represents one student and shows the average of their grades in the following eight exams: written & clinical exams in internal medicine, pediatrics, obstetrics & gynecology, and surgery. (B) shows the average grades of students pre-UpToDate (2012-2015) and post-UpToDate (2016-2017). The p-value represents a two-sided heteroscedastic t-test. The error bars represent standard error of the mean.



Figure 5: EBCR utilization over time by UR students and faculty. Lines show the average number of topics viewed per user per month by each user group. Only users who enrolled before 03/01/16 are included in this analysis (n = 185 faculty, 70 Doc4 students). Call-outs are added to describe events in the careers of Doc4 students

## Better evidence: A prospective cohort study assessing the utility of an Evidence-Based Clinical Resource at the University of Rwanda

### Supplementary Appendix

#### Supplementary Table 1: Participant enrolment

| Role           | Academic year                | Class at time of enrollment | Eligible    | Completing enrollment | % completing enrollment |
|----------------|------------------------------|-----------------------------|-------------|-----------------------|-------------------------|
| Students       | 2015-2016                    | PCL1 (1st year)             | 271         | 92                    | 34%                     |
|                |                              | Doc1 (3rd year)             | 125         | 90                    | 72%                     |
|                |                              | Doc4 (6th year)             | 86          | 84                    | 98%                     |
|                | 2016-2017                    | PCL1 (1st year)             | 102         | 24                    | 24%                     |
|                |                              | Doc1 (3rd year)             | 205         | 102                   | 50%                     |
|                |                              | Doc3 (5th year)             | 89          | 74                    | 83%                     |
|                |                              | Doc4 (6th year)             | 102         | 81                    | 79%                     |
|                | <b>Total - students</b>      |                             |             | <b>980</b>            | <b>547</b>              |
| <b>Faculty</b> | <b>Continuous enrollment</b> |                             | <b>1084</b> | <b>325</b>            | <b>29%</b>              |

**Supplementary Table 1: Participant enrolment.** Table shows the number of eligible students and faculty by role, academic year at time of enrollment, and class at time of enrollment. Table also shows the number of students and faculty who completed enrollment, and the percentage of eligible students who completed enrollment.

1 STROBE Statement—Checklist of items that should be included in reports of *cohort studies*

|                              | Item No | Recommendation                                                                                                                                                                                                                                                                                                                                                                                                                                                                                                                                          |
|------------------------------|---------|---------------------------------------------------------------------------------------------------------------------------------------------------------------------------------------------------------------------------------------------------------------------------------------------------------------------------------------------------------------------------------------------------------------------------------------------------------------------------------------------------------------------------------------------------------|
| <b>Title and abstract</b>    | 1       | (a) Indicate the study's design with a commonly used term in the title or the abstract<br><b>Study design indicated in the title</b><br>(b) Provide in the abstract an informative and balanced summary of what was done and what was found. <b>Page 2, abstract</b>                                                                                                                                                                                                                                                                                    |
| <b>Introduction</b>          |         |                                                                                                                                                                                                                                                                                                                                                                                                                                                                                                                                                         |
| Background/rationale         | 2       | Explain the scientific background and rationale for the investigation being reported<br><b>Page 3, introduction</b>                                                                                                                                                                                                                                                                                                                                                                                                                                     |
| Objectives                   | 3       | State specific objectives, including any prespecified hypotheses. <b>Page 6, last paragraph of "Introduction"</b>                                                                                                                                                                                                                                                                                                                                                                                                                                       |
| <b>Methods</b>               |         |                                                                                                                                                                                                                                                                                                                                                                                                                                                                                                                                                         |
| Study design                 | 4       | Present key elements of study design early in the paper. <b>Abstract</b>                                                                                                                                                                                                                                                                                                                                                                                                                                                                                |
| Setting                      | 5       | Describe the setting, locations, and relevant dates, including periods of recruitment, exposure, follow-up, and data collection. <b>Page 6, Methods ("Setting" and "Intervention")</b>                                                                                                                                                                                                                                                                                                                                                                  |
| Participants                 | 6       | (a) Give the eligibility criteria, and the sources and methods of selection of participants. Describe methods of follow-up. <b>Methods ("Intervention")</b><br>(b) For matched studies, give matching criteria and number of exposed and unexposed. <b>Not a matched study</b>                                                                                                                                                                                                                                                                          |
| Variables                    | 7       | Clearly define all outcomes, exposures, predictors, potential confounders, and effect modifiers. Give diagnostic criteria, if applicable. <b>Page 22, legend of Table 1</b>                                                                                                                                                                                                                                                                                                                                                                             |
| Data sources/<br>measurement | 8*      | For each variable of interest, give sources of data and details of methods of assessment (measurement). Describe comparability of assessment methods if there is more than one group. <b>Page 22, legend of Table 1</b>                                                                                                                                                                                                                                                                                                                                 |
| Bias                         | 9       | Describe any efforts to address potential sources of bias, <b>Page 8 "Data analysis"</b>                                                                                                                                                                                                                                                                                                                                                                                                                                                                |
| Study size                   | 10      | Explain how the study size was arrived at. <b>Study size was determined based on number of students enrolled at UR</b>                                                                                                                                                                                                                                                                                                                                                                                                                                  |
| Quantitative variables       | 11      | Explain how quantitative variables were handled in the analyses. If applicable, describe which groupings were chosen and why <b>Not applicable</b>                                                                                                                                                                                                                                                                                                                                                                                                      |
| Statistical methods          | 12      | (a) Describe all statistical methods, including those used to control for confounding. <b>Page 8 "Data analysis"</b><br>(b) Describe any methods used to examine subgroups and interactions. <b>Not applicable</b><br>(c) Explain how missing data were addressed. <b>Not applicable. No statistical inference was performed for students who did not complete the 1-year follow up survey</b><br>(d) If applicable, explain how loss to follow-up was addressed. <b>Not applicable</b><br>(e) Describe any sensitivity analyses. <b>Not applicable</b> |
| <b>Results</b>               |         |                                                                                                                                                                                                                                                                                                                                                                                                                                                                                                                                                         |
| Participants                 | 13*     | (a) Report numbers of individuals at each stage of study—eg numbers potentially eligible, examined for eligibility, confirmed eligible, included in the study, completing follow-up, and analysed. <b>Supplementary Table 1</b><br>(b) Give reasons for non-participation at each stage. <b>Students were invited to participate and voluntarily opted in. Reasons for non-participation were not documented.</b><br>(c) Consider use of a flow diagram. <b>Not applicable</b>                                                                          |



|                                                    |                          |     |                                                                                                                                                                                                                                                                                                                                                                                                                                                                                                         |
|----------------------------------------------------|--------------------------|-----|---------------------------------------------------------------------------------------------------------------------------------------------------------------------------------------------------------------------------------------------------------------------------------------------------------------------------------------------------------------------------------------------------------------------------------------------------------------------------------------------------------|
| 1<br>2<br>3<br>4<br>5<br>6<br>7<br>8<br>9          | Descriptive data         | 14* | (a) Give characteristics of study participants (eg demographic, clinical, social) and information on exposures and potential confounders. <b>Page 6, Methods (“Setting” and “Intervention”)</b><br><hr/> (b) Indicate number of participants with missing data for each variable of interest. <b>Page 9, results</b><br><hr/> (c) Summarise follow-up time (eg, average and total amount). <b>Page 6, Methods (“Setting” and “Intervention”)</b>                                                        |
| 10<br>11                                           | Outcome data             | 15* | Report numbers of outcome events or summary measures over time. <b>Page 10, “Results”</b>                                                                                                                                                                                                                                                                                                                                                                                                               |
| 12<br>13<br>14<br>15<br>16<br>17<br>18<br>19<br>20 | Main results             | 16  | (a) Give unadjusted estimates and, if applicable, confounder-adjusted estimates and their precision (eg, 95% confidence interval). Make clear which confounders were adjusted for and why they were included. <b>Page 22, Table 1 legend</b><br><hr/> (b) Report category boundaries when continuous variables were categorized. <b>Not applicable</b><br><hr/> (c) If relevant, consider translating estimates of relative risk into absolute risk for a meaningful time period. <b>Not applicable</b> |
| 21<br>22<br>23                                     | Other analyses           | 17  | Report other analyses done—eg analyses of subgroups and interactions, and sensitivity analyses <b>Page 7, Methods (“Data analysis”)</b>                                                                                                                                                                                                                                                                                                                                                                 |
| 24                                                 | <b>Discussion</b>        |     |                                                                                                                                                                                                                                                                                                                                                                                                                                                                                                         |
| 25                                                 | Key results              | 18  | Summarise key results with reference to study objectives. <b>Page 10, “Discussion”</b>                                                                                                                                                                                                                                                                                                                                                                                                                  |
| 26<br>27<br>28<br>29                               | Limitations              | 19  | Discuss limitations of the study, taking into account sources of potential bias or imprecision. Discuss both direction and magnitude of any potential bias. <b>Page 11, “Limitations”</b>                                                                                                                                                                                                                                                                                                               |
| 30<br>31<br>32<br>33                               | Interpretation           | 20  | Give a cautious overall interpretation of results considering objectives, limitations, multiplicity of analyses, results from similar studies, and other relevant evidence. <b>Page 10, “Discussion”</b>                                                                                                                                                                                                                                                                                                |
| 34<br>35<br>36                                     | Generalisability         | 21  | Discuss the generalisability (external validity) of the study results. <b>Page 12, “Next steps”</b>                                                                                                                                                                                                                                                                                                                                                                                                     |
| 37                                                 | <b>Other information</b> |     |                                                                                                                                                                                                                                                                                                                                                                                                                                                                                                         |
| 38<br>39<br>40<br>41                               | Funding                  | 22  | Give the source of funding and the role of the funders for the present study and, if applicable, for the original study on which the present article is based. <b>Page 13, “Funding”</b>                                                                                                                                                                                                                                                                                                                |

\*Give information separately for exposed and unexposed groups.

**Note:** An Explanation and Elaboration article discusses each checklist item and gives methodological background and published examples of transparent reporting. The STROBE checklist is best used in conjunction with this article (freely available on the Web sites of PLoS Medicine at <http://www.plosmedicine.org/>, Annals of Internal Medicine at <http://www.annals.org/>, and Epidemiology at <http://www.epidem.com/>). Information on the STROBE Initiative is available at <http://www.strobe-statement.org>.
