# Supplementary material for: Better evidence: prospective cohort study assessing the utility of an evidence-based clinical resource at the University of Rwanda
Source: PubMed Central journal article supplement — BMJ Open. 2019 Aug 8;9(8):e026947. doi: 10.1136/bmjopen-2018-026947 (PMC6701685; doi:10.1136/bmjopen-2018-026947), 2019-08-08
Supplement: bmjopen-2018-026947supp001.pdf [file bmjopen-2018-026947supp001.pdf]

**Better evidence: A prospective cohort study assessing the utility of an Evidence-Based Clinical Resource at the University of Rwanda**

Supplementary Appendix

**Supplementary Table 1: Participant enrolment**

| <b>Role</b>    | <b>Academic year</b>         | <b>Class at time of enrollment</b> | <b>Eligible</b> | <b>Completing enrollment</b> | <b>% completing enrollment</b> |
|----------------|------------------------------|------------------------------------|-----------------|------------------------------|--------------------------------|
| Students       | 2015-2016                    | PCL1 (1st year)                    | 271             | 92                           | 34%                            |
|                |                              | Doc1 (3rd year)                    | 125             | 90                           | 72%                            |
|                |                              | Doc4 (6th year)                    | 86              | 84                           | 98%                            |
|                | 2016-2017                    | PCL1 (1st year)                    | 102             | 24                           | 24%                            |
|                |                              | Doc1 (3rd year)                    | 205             | 102                          | 50%                            |
|                |                              | Doc3 (5th year)                    | 89              | 74                           | 83%                            |
|                |                              | Doc4 (6th year)                    | 102             | 81                           | 79%                            |
|                | <b>Total - students</b>      |                                    |                 | <b>980</b>                   | <b>547</b>                     |
| <b>Faculty</b> | <b>Continuous enrollment</b> |                                    | <b>1084</b>     | <b>325</b>                   | <b>29%</b>                     |

**Supplementary Table 1: Participant enrollment.** Table shows the number of eligible students and faculty by role, academic year at time of enrollment, and class at time of enrollment. Table also shows the number of students and faculty who completed enrollment, and the percentage of eligible students who completed enrollment.
